# Supplementary material for: A qualitative study of pregnancy-related anxiety among women in Tanzania
Source: PubMed Central journal article supplement — BMJ Open. 2017 Aug 3;7(8):e016072. doi: 10.1136/bmjopen-2017-016072 (PMC5629724; doi:10.1136/bmjopen-2017-016072), 2017-08-03
Supplement: bmjopen-2017-016072.draft_revisions.pdf [file bmjopen-2017-016072.draft_revisions.pdf]

# BMJ Open

BMJ Open is committed to open peer review. As part of this commitment we make the peer review history of every article we publish publicly available.

When an article is published we post the peer reviewers' comments and the authors' responses online. We also post the versions of the paper that were used during peer review. These are the versions that the peer review comments apply to.

The versions of the paper that follow are the versions that were submitted during the peer review process. They are not the versions of record or the final published versions. They should not be cited or distributed as the published version of this manuscript.

BMJ Open is an open access journal and the full, final, typeset and author-corrected version of record of the manuscript is available on our site with no access controls, subscription charges or pay-per-view fees (<http://bmjopen.bmj.com>).

If you have any questions on BMJ Open's open peer review process please email [editorial.bmjopen@bmj.com](mailto:editorial.bmjopen@bmj.com)

# BMJ Open

## Domains of pregnancy-related anxiety scale: A phenomenological approach

|                                 |                                                                                                                                                                                                                                                                                                                                                                                                                         |
|---------------------------------|-------------------------------------------------------------------------------------------------------------------------------------------------------------------------------------------------------------------------------------------------------------------------------------------------------------------------------------------------------------------------------------------------------------------------|
| Journal:                        | <i>BMJ Open</i>                                                                                                                                                                                                                                                                                                                                                                                                         |
| Manuscript ID                   | bmjopen-2017-016072                                                                                                                                                                                                                                                                                                                                                                                                     |
| Article Type:                   | Research                                                                                                                                                                                                                                                                                                                                                                                                                |
| Date Submitted by the Author:   | 25-Jan-2017                                                                                                                                                                                                                                                                                                                                                                                                             |
| Complete List of Authors:       | Rosario, Melanie; University of Calgary, Faculty of Nursing<br>Premji, Shahirose; University of Calgary, Faculty of Nursing<br>Nyanza, Elias; Catholic University of Health and Allied Sciences, School of Public Health; University of Calgary, Community Health Sciences, Cumming School of Medicine<br>Raffin, Shelley; University of Calgary, Nursing<br>Este, David; University of Calgary, Faculty of Social Work |
| <b>Primary Subject Heading</b>: | Global health                                                                                                                                                                                                                                                                                                                                                                                                           |
| Secondary Subject Heading:      | Mental health, Public health, Qualitative research                                                                                                                                                                                                                                                                                                                                                                      |
| Keywords:                       | PERINATOLOGY, PRIMARY CARE, Anxiety disorders < PSYCHIATRY, PUBLIC HEALTH, QUALITATIVE RESEARCH                                                                                                                                                                                                                                                                                                                         |
|                                 |                                                                                                                                                                                                                                                                                                                                                                                                                         |

SCHOLARONE™  
Manuscripts

**Title:** Domains of the pregnancy-related anxiety scale: A phenomenological approach

**Authors:** Melanie King Rosario<sup>1\*</sup>, Shahirose Sadrudin Premji<sup>1,2\*</sup> §, Elias Charles Nyanza<sup>2,3</sup>, Shelley Raffin Bouchal<sup>1</sup>, David Este<sup>4</sup>

<sup>1</sup> Faculty of Nursing, University of Calgary, Calgary, AB, CANADA

<sup>2</sup> Community Health Sciences, Cumming School of Medicine, University of Calgary, Calgary, AB, CANADA

<sup>3</sup> School of Public Health, Catholic University of Health and Allied Sciences, Bugando Area, Mwanza, Tanzania

<sup>4</sup> Faculty of Social Work, University of Calgary, Calgary, AB, CANADA

\* Equal Authorship

§ Corresponding author

**Correspondence to:**

Shahirose Premji

Faculty of Nursing, University of Calgary

2500 University Drive NW

Calgary, Alberta, CANADA T2N 1N4

Email: [premjis@ucalgary.ca](mailto:premjis@ucalgary.ca)

Tel: 403.220.4081

1  
2  
3 **Keywords:** Pregnancy-related anxiety; anxiety; women's health; pregnancy; global health  
4  
5

6 **Word count:** 4,677  
7  
8  
9  
10  
11  
12  
13  
14  
15  
16  
17  
18  
19  
20  
21  
22  
23  
24  
25  
26  
27  
28  
29  
30  
31  
32  
33  
34  
35  
36  
37  
38  
39  
40  
41  
42  
43  
44  
45  
46  
47  
48  
49  
50  
51  
52  
53  
54  
55  
56  
57  
58  
59  
60

For peer review only

## ABSTRACT

**Objectives:** To explore and understand the experiences and priorities of pregnant women living with pregnancy-related anxiety in Mwanza, Tanzania.

**Design:** Descriptive phenomenological approach.

**Setting:** Two clinics in the Ilemela and Nyamagana districts of Mwanza.

**Participants:** Pregnant and postpartum women who obtained high scores on a PRA scale during pregnancy in a larger quantitative study were contacted to participate in an interview (10 women, aged 18-34 years; 3 HIV positive).

**Measures:** Semi-structured interviews were undertaken, with guiding questions related to the women's experience during pregnancy. The Colaizzi method was utilized with transcripts that had been translated and back-translated from Swahili to English and then hand-coded by the interviewer, with independent review by another researcher to verify the analysis.

**Results:** PRA, as experienced by women in Mwanza, was a state of worry and concern, often causing physical symptoms, and disrupting personal sense of peace. While some themes in the women's experiences reflected the domains examined in the PRA scale used to identify potential participants, others such as lack of knowledge, partner relationship, interactions with the health care system, spirituality, and fear of HIV/AIDS were otherwise missing. Their prominence in the participants' stories broadens our understanding of PRA.

**Conclusions:** The realities and viewpoints of women in LMIC experiencing PRA are still relatively unknown. The findings from this study provided much-needed insight into the perspectives and priorities of women in Mwanza who have experienced PRA and support the need to further explore this phenomenon in other LMIC. The additional domains identified

1  
2  
3 reinforce the need for a PRA tool that will accurately and adequately capture the complexities of  
4  
5 PRA for women in this region.  
6  
7  
8  
9

## 10 **ARTICLE SUMMARY**

### 11 **Strengths and limitations of this study**

- 12  
13  
14  
15 • Partnerships with the local university in Mwanza allowed involvement and collaboration  
16 with local health professionals in the development of the method, recruitment, and data  
17 collection processes.  
18  
19
- 20  
21  
22 • Extensive international clinical and research experience by the researcher and supervisor  
23 was instrumental in creating relationships and opportunities to ensure that the voice of the  
24 patient was heard and that local context and culture was incorporated into the data  
25 collection and analysis process.  
26  
27
- 28  
29  
30 • This is the first qualitative study of the experiences of women who have experienced  
31 PRA in Tanzania.  
32  
33
- 34  
35  
36 • The exclusion criterion was amended to include early postpartum women as many  
37 women from the associated quantitative study began to deliver before recruitment had  
38 been completed. While we acknowledge this alteration in the study design as a potentially  
39 significant limitation, postpartum women demonstrated the ability to draw from their  
40 experience during pregnancy and their stories were rich with detail.  
41  
42
- 43  
44  
45 • The stigma of mental illness and presence of a local third party (translator) may have  
46 affected the level of participation, engagement, or willingness of women to participate in  
47 the interviews.  
48  
49  
50  
51  
52  
53  
54  
55  
56  
57  
58  
59  
60

1  
2  
3  
4  
5  
6  
7  
8  
9  
10  
11  
12  
13  
14  
15  
16  
17  
18  
19  
20  
21  
22  
23  
24  
25  
26  
27  
28  
29  
30  
31  
32  
33  
34  
35  
36  
37  
38  
39  
40  
41  
42  
43  
44  
45  
46  
47  
48  
49  
50  
51  
52  
53  
54  
55  
56  
57  
58  
59  
60

- Due to time constraints, it was not feasible to return to the participants to present initial findings and collect feedback, as per Colaizzi’s method.

For peer review only

## INTRODUCTION

Pregnancy-related anxiety (PRA), as determined from research in many high-income countries, has been strongly linked to preterm births, pregnancy complications, and negative infant outcomes.[1-9] PRA, a distinctive syndrome, encompasses specific dimensions that distinguish it from depression, stress, or generalized anxiety.[10, 11] These dimensions include fears and worries about the health and survival of the unborn child, having an ‘abnormal’ baby, the birthing process, developing medical problems during pregnancy, and ability to parent and care for the infant following birth.[10-16] There has been little exploration into women’s experience of PRA.

In 2012, women in LMIC had a 1 in 150 risk of dying from complications in childbirth or pregnancy; this was in sharp contrast to a risk of 1 in 3800 for women in high-income countries.[17] In 2012, Canada reported 555 infant deaths due to complications from preterm birth, which is the greatest cause of neonatal deaths globally, whereas Tanzania reported over 17,000.[18] The presence and impact of PRA will be even more pronounced in LMIC given the high maternal and child mortality rates, poverty, and lack of resources. The realities and viewpoints of women in LMIC experiencing PRA are still relatively unknown as only one qualitative study explored antenatal mental distress in Africa.[19] The study, undertaken in Ethiopia,[19] explored the broad phenomenon of antenatal mental distress rather than the more specific focus of PRA.

Attempts to transfer evidence from high-income countries to inform programs or initiative in LMIC, without alterations for cultural and contextual relevancy, have often proven to be



1  
2  
3 unsuccessful, if not problematic.[20] In an effort to address the lack of knowledge about PRA in  
4  
5 LMIC, this study explored the concept of PRA through the lived experience of pregnant women  
6  
7 living in Mwanza, Tanzania. We present major themes in the participants' stories that did not  
8  
9 reflect the domains of the PRA scale as it reflects the range of anxiety symptoms experienced by  
10  
11 pregnant women in LMIC. We incorporate culture and context to understand the meaning given  
12  
13 by the participants to the PRA experiences that have taken place.  
14  
15  
16  
17  
18  
19

## 20 **METHODS**

21  
22 Women's experience of PRA was explored through the Husserlian lens of descriptive  
23  
24 phenomenology[21-23] rather than a Heideggerian interpretive approach.[21] As such,  
25  
26 bracketing permitted the reduction of the experience to the essence of PRA as it was experienced  
27  
28 by women in Mwanza, free from conscious interpretation and influence of the researchers.[21-  
29  
30 23] Important elements of the participants' experiences—gender related inequities, low literacy,  
31  
32 low education, and lack of decision-making authority—were clarified through field notes and  
33  
34 peer debriefing.[23, 24]  
35  
36  
37  
38  
39  
40

### 41 **Setting and participants**

42  
43 The study sample was obtained from a quantitative study underway to examine the individual  
44  
45 and collective contribution of PRA and depression in the prediction of preterm birth and  
46  
47 postpartum depression.[25] Purposive sampling was employed to identify women (a) 18 to 34  
48  
49 weeks' gestation, (b) able to speak English or Swahili, and (c) had high scores on the PRA scale.  
50  
51 Eligible scores from the PRA were determined using Fairlier et al.'s[26] recommendations of  
52  
53 three or more responses indicating high anxiety. As research staff reviewed records of women  
54  
55  
56  
57  
58  
59  
60

1  
2  
3 enrolled in the quantitative study, they identified and contacted eligible participants. The  
4  
5 potential pool of participants was smaller than anticipated, as contacting women after they had  
6  
7 left the clinic proved challenging and women began to deliver. Through a consultative process  
8  
9 with the research team of the quantitative study, and approved by ethics, the sample included  
10  
11 pregnant and postpartum women with high-anxiety with three or more responses indicating high  
12  
13 anxiety, two high anxiety and at least two moderate anxiety responses, or one high anxiety and at  
14  
15 least three moderate anxiety responses. Recruitment was ongoing as interviews took place;  
16  
17 repetition of discovered information and confirmation of data that had been previously collected  
18  
19 was achieved after 10 interviews, indicating data saturation.[27]  
20  
21  
22  
23  
24  
25  
26

27 The study recruited pregnant women from antenatal clinics in the Ilemela and Nyamagana  
28  
29 districts of Mwanza, Tanzania. The clinic provided care to 40 to 50 women daily; 40% of these  
30  
31 women deliver at hospitals and health centres that provide maternal and child health and delivery  
32  
33 facilities.[25]  
34  
35  
36  
37  
38

### 39 **Data collection**

40  
41 A research associate inquired via direct telephone interaction, using a standard script in Swahili,  
42  
43 about women's interest to participate in an interview in a private room at the antenatal clinic that  
44  
45 they were familiar with. During the face-to-face contact, details about the study including  
46  
47 purpose of study, time commitment, risks, benefits, privacy, consent, and voluntary nature of  
48  
49 participation was shared prior to obtaining informed consent. A trained interviewer (MKR)  
50  
51 conducted semi-structured interviews in the clinics in Mwanza from October to November of  
52  
53 2014. The interview guide (Appendix A) provided general questions to direct participants in a  
54  
55  
56  
57  
58  
59  
60

1  
2  
3 uniform manner; interviews were also participant directed and the interviewer took cues, probed,  
4  
5 and requested further detail based on the information that was shared. Interviews were 40-75  
6  
7 minutes long, and were (a) conducted with the help of a Swahili translator, (b) audio-recorded  
8  
9 with permission, (c) transcribed in Swahili, and (d) translated to English and back-translated to  
10  
11 Swahili to ensure language equivalency. Field notes were maintained throughout the study and  
12  
13 used to complement the interview data and emphasize the essence of the participants'  
14  
15 experiences of PRA. Other sources of data included demographic information about the  
16  
17 participants, which was obtained from the larger study to reduce participant burden.  
18  
19  
20  
21  
22  
23  
24

## 25 **Analysis**

26  
27 The Colaizzi method, with the exception of the final step of validating data with the participants,  
28  
29 guided the analytic process.[27, 28] Each audio recording and transcript was reviewed numerous  
30  
31 times while reflecting on field observations (e.g., facial expressions, gestures, disposition).[27]  
32  
33 Bracketing continued during this process to set aside beliefs, preconceptions, and values and be  
34  
35 fully immersed in the participants' descriptions. Significant statements and phrases that pertain  
36  
37 to PRA were identified, extracted, compiled into a separate document, reviewed, and associated  
38  
39 with a formulated meaning and assigned to a broad category, or theme.[27, 28] A second  
40  
41 researcher (SP) verified the process and ensured consistency in the meanings derived from  
42  
43 statements, referring to the raw data as needed.[29] Formulated meanings associated with each  
44  
45 significant statement were organized into categories or unique structure of clusters of themes and  
46  
47 incorporated together to create a specific thematic impression.[27, 28] After merging all themes,  
48  
49 a thematic map was compiled and an exhaustive description of the phenomenon of PRA in  
50  
51  
52  
53  
54  
55  
56  
57  
58  
59  
60

1  
2  
3 Mwanza, Tanzania was detailed.[27] Pseudonyms were utilized, as well as participant numbers  
4  
5 correlating to the quantitative study.  
6  
7  
8  
9

10  
11 Triangulation of qualitative data against the 10-items on the PRA scale enabled examination of  
12  
13 the phenomenon of PRA from multiple perspectives.[30, 31] An additional method of  
14  
15 triangulation, peer debriefing, prevented bias and allowed alternate points of view to emerge in  
16  
17 the understanding of local context and culture.[24] Peer debriefing occurred with the interpreter,  
18  
19 members of the community, employees and students at the Catholic University of Health and  
20  
21 Allied Sciences office, and community members, including shop keepers, taxi drivers, and  
22  
23 neighbours. Although we confirmed the PRA scale correctly identified these participants as  
24  
25 experiencing the phenomenon under exploration, additional domains of PRA were also  
26  
27 identified. Their prominence in the participant stories is important in broadening the  
28  
29 understanding of the phenomenon of PRA. We present these additional domains of PRA in the  
30  
31 findings.  
32  
33  
34  
35  
36  
37  
38

### 39 **Limitations**

40  
41 Enrolling women in postpartum period did not overly influence their ability to recall the  
42  
43 experience of PRA as evident from the richness of the stories. Women were reminded and  
44  
45 encouraged to reflect only on their experience during pregnancy. The presence of a translator and  
46  
47 stigma attributed to 'mental illness' may have affected the level of participation or engagement  
48  
49 in the interviews.[32] The inability to return to the participants to validate the study findings is  
50  
51 also acknowledged as a limitation.  
52  
53  
54  
55  
56  
57  
58  
59  
60

## RESULTS

All of the women were residing in semi-urban areas, urban areas, or rural areas with reasonable access to semi-urban centers in Mwanza. Women were aged between 18 to 34 years of age. Of the 10 women, 4 were pregnant at the time of the interview and 6 had already delivered. Seven of the women (70%) were multiparous, and 2 had previously experienced the death of a child. Most of the women (90%) indicated that they were married or cohabitating with the child's father. Three of the women were HIV positive. Levels of education varied from no schooling to higher levels of basic education.

Five themes did not reflect domains of the PRA scale: knowledge and understanding, partner relationships, interactions with the health care system, spirituality, and fear of HIV/AIDS.

### Knowledge and understanding

Lack of knowledge, or understanding of what was *normal*, was an underlying issue in many of the worries participants had about pregnancy and taking care of a new baby. Berta disclosed

I get frantic at times because I know that my knowledge and understanding of what a baby might be suffering from is low. Currently she is active in my belly. But when she is born, she might cry at night and there is no one to help me learn what might be wrong with her. Mostly I will guess. But for the days and nights now, I worry what could happen to her because of me.

Margaret found herself asking people around her about symptoms she was experiencing. "For instance, last week I had very severe abdominal pain for about 3 hours; I could not sleep. People

1  
2  
3 tell me that it is a normal situation.” Neema experienced heightened anxiety as she could not  
4 understand her somatic symptoms explaining  
5  
6

7  
8 I felt bad and I was ill. About my health, after seeing myself very thin since I was so  
9 often ill, though it [was] for all my pregnancies but in this one it was severe with a lot of  
10 stress...The feeling of body weakness and fatigability went throughout the pregnancy.  
11  
12

13  
14 Both Neema and Margaret experienced symptoms that they feared might be attributed to HIV  
15 and were terrified that this might be the cause of their symptoms. Margaret “fail[ed] to eat” and  
16 was “vomiting a lot,” while Neema “felt ill”, became “very thin,” and was overcome with  
17 “weakness”, all of which contributed to the fear of having HIV. Neema explained “I was tested  
18 when I was about 8 months pregnant for HIV infection and I was fine, I was not infected. But all  
19 those months, I thought I was.” Although both were tested and received results that they were not  
20 HIV positive, their lack of knowledge of common somatic symptoms of pregnancy caused  
21 significant distress.  
22  
23  
24  
25  
26  
27  
28  
29  
30  
31  
32  
33  
34  
35

### 36 **Partner relationships**

37  
38 Grace described the support her partner provided after she and their first child was diagnosed  
39 with HIV as: “[he] didn’t disturb or humiliate me as for why he has no AIDS and we do, he  
40 accepted us.” Grace kept on thinking of the current pregnancy “if all my children will be infected  
41 how things would be. Even when I rest for a few days, about 3 or more days then the concerns  
42 keep on coming back.” Neema candidly shared the worries caused as result of her husband:  
43  
44  
45  
46  
47  
48  
49

50 I don’t know what was the issue but they say some might hate you when you are  
51 pregnant, I thought that was the reason. When you are in such situation and he comes  
52 asking for sex, it is an issue. It was very difficult for me...maybe because he found me  
53  
54  
55  
56  
57  
58  
59  
60

1  
2  
3 often sick, maybe he was hurting inside...happiness diminishes, love fades away. I  
4  
5 thought he might have been seeing another woman. I don't know, but at the late stages of  
6  
7 my pregnancy he became close, he changed and that was a relief.  
8  
9

10  
11  
12 There were participants who had longed for emotional support from their partners but were  
13  
14 unable to obtain it. Grace's husband travelled frequently; she explained "as his work is that he  
15  
16 has to travel...he is often not at home...he does not stay at home most of the time. So it is not  
17  
18 easy to tell him what happens to me every day." Berta explained that at one point in her  
19  
20 pregnancy, "My partner took me to my parents' place and left me there. No one would talk to me  
21  
22 without my husband there. Even visitors would only talk to my father. It was not like they were  
23  
24 coming for me, or to know how I feel or how I was doing. They had no time to ask all that."  
25  
26 Conversations with research associates revealed that women in Tanzania (or Tanzanians in  
27  
28 general) often do not discuss personal concerns with friends, or even family. Once Berta returned  
29  
30 from her parents' place, she explained "During that time [pregnancy] my husband was not  
31  
32 around, he had travelled. We had poor communication when he was away. Whenever I called, he  
33  
34 was not reachable. At the time he was away, I was already confused because [of] my situation  
35  
36 and I needed him... but at the time I couldn't get through to him, I was very worried during that  
37  
38 time."  
39  
40  
41  
42  
43  
44  
45  
46  
47

48 For participants in this study, the notion of *support* was contextually and culturally defined as  
49  
50 financial support as gleaned from peer debriefing. Aisha had moved to Mwanza from her rural  
51  
52 hometown, where weeks passed since her partner left. Aisha had little contact with the father of  
53  
54 her unborn child, and received little help when he did respond. "What gave me worries  
55  
56  
57  
58  
59  
60

1  
2  
3 was...there were times I...asked for support and he wouldn't help me." Aisha had moved to  
4  
5 Mwanza from her rural hometown, where weeks passed since her partner left. She recalled,  
6  
7  
8 "During that time, when it happens that I face financial issues and I ask him for help and he  
9  
10 [father of the child] doesn't respond, I was just ... crying. What if I needed medicine?"  
11  
12  
13

### 14 15 **Interactions with the health care system**

16  
17 All participants in this study received antenatal care at least once during pregnancy. Margaret  
18 shared "I am used to calling the nurse whenever I get worse, I meet her and she helps me."  
19

20 Margaret would "do whatever the doctors instructed [her] to do" and found "I feel peace  
21  
22 whenever I go to the hospital, since [she] gets advice from them to be well and keep [her] baby  
23  
24 well." Joyce also recalled positive interactions with health care providers; however, "what I see  
25  
26 is, they [health care providers] are more supportive in this pregnancy, especially the nurses.  
27  
28

29 Whenever I face a problem they advise and help me." However, some women experienced less  
30  
31 favourable interactions. Berta recalled a stressful week in which numerous providers  
32  
33 contradicted her diagnosis of "low blood" (a common term used to mean anemia—often women  
34  
35 will know this phrase in English without the need for translation) and informed her "that I might  
36  
37 fall down or deliver a dead baby or that is how all of my reproduction will be." The worry in her  
38  
39 voice and the expression on her face depicted even more than her words. Her voice grew shaky,  
40  
41 her eyes began to water, and she fidgeted with her hands in her lap. Berta felt as though the  
42  
43 interaction with health care providers had exacerbated her worries explaining:  
44  
45  
46  
47  
48  
49

50 So she didn't give me clear information or encourage me. I felt like she was adding on  
51  
52 my problems since when I was trying more to get information from her, she said "There  
53  
54 is this lady who came here with the same situation as yours"; I directed her, so let's find  
55  
56  
57  
58  
59  
60



1  
2  
3 her, she can give reliable information. So herself as a nurse who was just advising me on  
4  
5 my issue couldn't know where I could get help. So I fel she added on me a load in my  
6  
7 thoughts.  
8  
9

10 Neema described a particularly difficult day in which she had arrived very early at clinic for  
11  
12 assessing high blood pressure. Reflecting on the process of taking number to receive service she  
13  
14 shared:  
15

16  
17 I came early and I was ill on that day. I was the 4<sup>th</sup> lady to arrive. At a time we were  
18  
19 provided with numbers I never knew, I had gone to the toilet and there were about 99  
20  
21 women in queue. I missed the number. The nurse refused to give me a number saying  
22  
23 'you were not around, there are people who were here early, you came late and you want  
24  
25 number.' I shed tears, I was upset and sad, I felt bad and I was ill, I went into the room  
26  
27 where they take physical measures.  
28  
29  
30  
31  
32  
33

34 Sarah had waited a long time to become pregnant thus when the time finally came, "I wished to  
35  
36 see my stomach grows fast. I used to check up on myself every now and then I felt like my  
37  
38 stomach was not growing, so I felt worried...if the child was alive inside my womb." Sarah  
39  
40 described frustration in being advised to stay on bed rest after experiencing bleeding in the first  
41  
42 trimester. She stated, "I don't want to take the bed rest, though they advised me to, I figured out  
43  
44 that I couldn't because I am working...I don't have much time to stay at home [considering that]  
45  
46 I would have to take maternity leave after delivery. I was so worried, I was frustrated. That was  
47  
48 very hard for me." While routine prenatal care was provided free of charge in Mwanza,[25]  
49  
50 strained relationships with health care providers, the inability to access additional services or lost  
51  
52 time at work, was an underlying issue in many of the narratives.  
53  
54  
55  
56  
57  
58  
59  
60

## Spirituality

The women's spirituality permeated many conversations, often woven among the fears and concerns they expressed. Imara had 3 girls and felt worried as her sister-in-law's wanted their brother to marry another woman who may be able to give birth to boys. She explained how her belief in God helped her to "take heart" (i.e., took courage) by thinking:

God is the one who provides, it is not like I am going to the market, that I choose I want this and that, no, I encouraged myself that God is the provider you can't say that I have only girls,...I believe God knows more and I don't.

Wema's "biggest worry was death" because "I was swollen all over the body, especially my feet and it was painful all over...the doctor I was advice, there were no any other cause except for the pregnancy. Wema's sister-in-law died from pre-eclampsia. When asked how she managed to cope with her worries, Wema simply replied, "I only prayed to God...I just pass through; it reach a point I had to take heart, thought it was God's plans." Similarly, Berta believed that "God is the one who knows it all..." including her own future and if she "will deliver safely or not." Despite her struggles, Berta "was encouraged by being thankful to God in everything." Sarah had experienced particular anxiety that her stomach was not growing large enough to indicate that a healthy child lay inside. For Sarah aside from her husband "Honestly, my other help was from prayers only. When I pray I get peace of mind. I stopped worrying. I believed my stomach would get larger. So as much as we talked and prayer, I felt peace."

## Fear of HIV/AIDS

1  
2  
3 Fears of HIV/AIDS consumed the thoughts of the pregnant women who could not explain their  
4 somatic symptoms. Margaret explained that, “I was vomiting a lot, not eating well, it made me  
5  
6 have poor health and I became very thin. So I was thinking, I had not tested [for HIV] and I was  
7  
8 very worried.” She described feeling scared “after seeing myself very thin, though it [was] for all  
9  
10 my pregnancies but in this one it was severe with a lot of stress...” Neema, who also saw herself  
11  
12 feeling thin and unwell, described:  
13  
14

15  
16  
17 It was during my early pregnancy but the feeling of body weakness and fatigability went  
18  
19 throughout the pregnancy, I was tested when I was about 8 months pregnant for HIV  
20  
21 infection, I was fine, I was not infected. My worry was because I was often sick and had  
22  
23 lost weight so much, so event that added in my thoughts.  
24  
25  
26  
27  
28

29 The three HIV positive women had relatively recent diagnoses – within the past three years –  
30  
31 were preoccupied with worries about their unborn child/infant, and concerns for their child’s  
32  
33 future if they were to pass away. Grace talked about her reactions to her HIV positive diagnoses:  
34  
35

36  
37 I was frightened and full of worries. I passed about three days without food since I had a  
38  
39 lot of stress and thoughts, I was sad, I was worried and I cried so much. I never expected  
40  
41 my baby be infected or even myself; I never knew until I became pregnant again and I  
42  
43 found out that I was HIV infected together with my oldest child.  
44  
45

46 Grace also discussed her concerns about the antiretrovirals that she began taking during her  
47  
48 pregnancy and their impact on her unborn child. She explained:  
49

50  
51 Those drugs were bringing me different conditions [side effects]. I felt like dizziness and  
52  
53 was thinking was these drugs to protect the child who was in my womb? If they make me  
54  
55  
56  
57  
58  
59  
60

1  
2  
3 feel this way, and in other days, I even lack sleep, with these conditions will my child be  
4  
5  
6 alive? Will the drug help me? I was worried.  
7

8 Joyce's initial "concern was perhaps my child would also get infected, I asked the doctors, they  
9  
10 reassured me and I stopped worrying." However, the initial reassurance faded as she considered  
11  
12 her own diagnosis and then explained, "Both of my parents died and relative from my husband's  
13  
14 side know nothing... I am worrying of delivering a baby who is HIV infected and was wondering  
15  
16 what if I die early, who would I leave my baby with?"  
17  
18  
19  
20  
21

## 22 **DISCUSSION**

23  
24 The PRA Scale[11, 16] has been identified as an appropriate tool for examining the experience  
25  
26 of PRA for women in high-income countries.[33] Nonetheless, there have been claims that this  
27  
28 tool, along with others designed to examine this phenomenon, displays relatively narrow  
29  
30 domains that may not reflect the essence of PRA experienced by women.[34] Our study  
31  
32 confirmed this assertion for women in LMIC, specifically in Mwanza. Lack of knowledge,  
33  
34 partner relationships, interactions with the health care system, spirituality, and fear of HIV/AIDS  
35  
36 are suggested as additional domains based on their strong presence in the narratives and themes  
37  
38 derived from the participants' stories. Table 1 provides suggestions for associated prompts  
39  
40 related to each of these domains based on the participants' stories. These prompts together with  
41  
42 the PRA scale may assist in the development of a comprehensive measurement scale that will  
43  
44 more accurately depict the sociocultural context of life in LMIC, specifically Mwanza, and  
45  
46 therefore more accurately assess and identify pregnant women who are experiencing PRA in this  
47  
48 region.  
49  
50  
51  
52  
53  
54  
55  
56  
57  
58  
59  
60

**Table 1.** Additional domains of pregnancy-related anxiety as detailed by participant narratives in Mwanza

| <b>Additional domains</b>                                                               | <b>Potential probes</b>                                                                                                                                                                                                                                          |
|-----------------------------------------------------------------------------------------|------------------------------------------------------------------------------------------------------------------------------------------------------------------------------------------------------------------------------------------------------------------|
| Knowledge and understanding                                                             | I have a lot of fear because I don't have enough information.<br><br>I am concerned (worried) because the health care provider could not give me information.                                                                                                    |
| Partner relationship                                                                    | I am worried because my partner is not around.<br><br>I worry about finances because my partner does not support me financially.                                                                                                                                 |
| Interactions with the health care system (including access to care and quality of care) | I am concerned about paying for transportation, medication or childcare to attend clinic.<br><br>I am concerned that I may need additional care or medication that I can't afford.<br><br>I am worried that health care practitioners won't know how to help me. |
| Spirituality                                                                            | I find relief from my worries when I pray or go to church.<br><br>Believing in God helps me to feel peace when I am fearful.                                                                                                                                     |
| Experience or fear of HIV/AIDS                                                          | I have a lot of fear because when I don't feel well as I think that I might be HIV positive.<br><br>I have worries about my pregnancy because of my HIV status.                                                                                                  |

The literature on PRA[2-9] outlines the numerous adverse effects for both mother and baby; many of these consequences of PRA were echoed in the participants' narratives. Participants appreciated that "thinking too much" or worrying, was *bad* for them, as well as the baby.

Partners/husband, friends, family, neighbours, and care providers informed these sentiments and "advised that the more you keep on thinking, the more you risk your baby" or you "might get miscarried or bear a child with weakness...don't stress, you might worry much and lose your life or the baby's." The stories of family, neighbours, and friends become increasingly valuable as a

1  
2  
3 source of information due to perceived lack of knowledge of health care professionals or lack of  
4  
5 trust in their advice.  
6  
7

8  
9  
10 In LMIC such as Mwanza, the use of the word *support* was complicated by poverty, as often  
11 fathers/partners may continue to provide financial resources, exacerbating a woman's  
12 dependency for survival, while providing little to no practical or emotional support.[35] There is  
13 increasing evidence that mental health issues in women may be related to social circumstances,  
14 including poverty, violence, and economic dependence.[36] The stories of the women in this  
15 study are similar to previous studies that indicated the significance of financial supporting  
16 women's feelings of anxiety.[37]  
17  
18  
19  
20  
21  
22  
23  
24  
25  
26  
27  
28

29 Mwanza, and Tanzania in general, remains a highly patriarchal society in which women are often  
30 not given ownership of their decisions, including decisions regarding health and medical care.  
31 [35] Research colleagues in Mwanza indicated that this might be due to any number of issues,  
32 including inability to meet sexual needs, decrease in ability to provide for the home, or the  
33 partner's stress about providing for another child. For many participants, these gender-based  
34 realities of life influenced family roles, interactions, and emotional support mechanisms and  
35 evoked feelings of frustration, anxiety, hopelessness, and resignation. Lack of perceived control  
36 over a situation can affect an individual's uncertainty and insecurity, often leading to increased  
37 anxiety.[38] Nearly all of the women made reference to utilizing spiritual-positive coping—  
38 religion, prayer, or belief in a greater power or plan—to overcome distressing situations and their  
39 potential or actual negative consequences.[39, 40] Spiritual-positive coping offers a framework  
40 to help individuals make sense of the *bigger* life questions, placing the power of a situation on a  
41  
42  
43  
44  
45  
46  
47  
48  
49  
50  
51  
52  
53  
54  
55  
56  
57  
58  
59  
60

1  
2  
3 greater entity. This can have many effects, including a reduction of guilt and feelings of  
4  
5 responsibility for a difficult or unfortunate situation.[41] Spirituality may lower anxiety levels,  
6  
7 increase feelings of security, provide additional social support, and reduce worry.[42-44] Few  
8  
9 studies have examined spirituality and mental health in Africa, despite it being recognized as a  
10  
11 significant aspect of daily life in Tanzania.[44]  
12  
13

14  
15  
16  
17 In LMIC, financial constraints, and multiple socio-political problems (e.g., poverty and  
18  
19 economic instability) that burden health care systems.[45] contribute to worry and uncertainty  
20  
21 throughout pregnancy. For participants with access to care the experience was at times  
22  
23 disappointing due to negative events endured with health care providers. In Tanzania, antenatal  
24  
25 services are widely available; however, quality of service and treatment remains an ongoing  
26  
27 issue due to lack of trained personnel, inadequate supplies and equipment, and poor  
28  
29 implementation of antenatal guidelines.[46, 47]  
30  
31  
32  
33  
34  
35

36  
37 Three of the 10 participants were HIV-positive, yet HIV played a significant role in not only  
38  
39 their stories, but in the lives of many of the participants. Many non-HIV positive participants  
40  
41 expressed constant fear or anxiety about being diagnosed with HIV. Their worries did not  
42  
43 indicate a positive diagnosis, but rather the reality of living in a highly affected area, with a  
44  
45 heightened sense of the reality and risks of this illness. Women with HIV have higher anxiety  
46  
47 symptoms during pregnancy due to maternal fears related to perinatal transmission of HIV.[48]  
48  
49

50  
51 All three of the participants with HIV openly discussed the intense fear of their child having  
52  
53 HIV.  
54  
55  
56  
57  
58  
59  
60

## CONCLUSIONS

How social processes, poverty, and culture informs mental health of women during pregnancy remains unexplored.[2] The social, economic, and cultural realities of women residing in Mwanza were exemplified in themes of lack of knowledge, partner relationship, interactions with the health care system, spirituality, and fear of HIV/AIDS that emerged from the narratives of women experiencing PRA. Our study provides insight in this regard and adds new knowledge about the essence of PRA experienced by women in Mwanza, Tanzania. The PRA scale appropriately explicates participants' fear, worries, and concerns related to their own health and survival during pregnancy, their infants' health during pregnancy and survival, as well as caregiving ability in the postpartum. The PRA scale, however, narrowly reflects domains that inform our understanding of PRA of women in Mwanza, Tanzania and perhaps other LMIC.

**Contributions:** MKR and SSP developed the research question, designed the study, participated in data analysis and drafted the manuscript. ECN coordinated efforts in Mwanza, including translating documents, obtaining ethics approval, and coordinating local assistants. SRB and DE provided consultation from the research design through to the manuscript development. All authors have contributed to the work and approved the manuscript.

**Funding:** The University of Calgary Research Grant (URGC) Program, SEED Grant, funded the larger quantitative study. MRK's graduate studies was support by scholarships including Alberta Graduate Student Scholarship, Charlotte Firth Memorial Graduate Scholarship in Community Health Nursing, Education for the Future Master of Nursing Scholarship, and the Queen Elizabeth II Graduate Scholarship.



1  
2  
3 **Acknowledgments:** The authors are most grateful to the women who participated in this study  
4 and bravely told their stories. The collaboration and contributions of the Catholic University of  
5 Health and Allied Sciences in Mwanza are also acknowledged, as well as the research associates,  
6 assistants, and translators, particularly Dr. Ola Jahanpour and Miss Audrey Bernard. We thank  
7 Jill Norris for technical writing assistance.  
8  
9

10  
11  
12  
13  
14 **Competing interests:** None declared.

15  
16  
17 **Ethics approval:** University of Calgary Conjoint Health Research Ethics Board (REB13-0399:  
18 larger study; REB14-0660: this study; and REB14-0660-MOD-1: to include postpartum women)  
19 and the Catholic University of Health and Allied Sciences.  
20  
21  
22

23  
24 **Data sharing statement:** The authors are happy to provide additional information utilizing the  
25 contact information provided.  
26  
27  
28  
29  
30  
31  
32  
33  
34  
35  
36  
37  
38  
39  
40  
41  
42  
43  
44  
45  
46  
47  
48  
49  
50  
51  
52  
53  
54  
55  
56  
57  
58  
59  
60

1  
2  
3  
4  
5  
6  
7  
8  
9  
10  
11  
12  
13  
14  
15  
16  
17  
18  
19  
20  
21  
22  
23  
24  
25  
26  
27  
28  
29  
30  
31  
32  
33  
34  
35  
36  
37  
38  
39  
40  
41  
42  
43  
44  
45  
46  
47  
48  
49  
50  
51  
52  
53  
54  
55  
56  
57  
58  
59  
60  
**REFERENCES**

1. Azar R, Singer S. Maternal prenatal state anxiety symptoms and birth weight: a pilot study. *Cent Eur J Med* 2012;7(6):747-52.
2. Dunkel Schetter C. Psychological science on pregnancy: stress processes, biopsychosocial models, and emerging research issues. *Annu Rev Psychol* 2011;62(1):531-58.
3. Dunkel Schetter C, Tanner L. Anxiety, depression and stress in pregnancy: implications for mothers, children, research, and practice. *Curr Opin Psychiatry* 2012;25(2):141-48.
4. Gurung RAR, Dunkel Schetter C, Collins N, Rini C, Hobel CJ. Psychosocial predictors of prenatal anxiety. *J Soc Clin Psychol* 2005;24(4):497-519.
5. Lobel M, Cannella DL, DeVincent C, *et al.* Pregnancy-specific stress, prenatal health behaviors, and birth outcomes. *Health Psychol* 2008;27(5):604-15.
6. Mancuso RA, Dunkel Schetter C, Rink CM, *et al.* Maternal prenatal anxiety and corticotropin-releasing hormone associated with timing of delivery. *Psychosom Med* 2004;66(5):762-69.
7. Sawyer A, Ayers S, Smith H. Pre- and postnatal psychological wellbeing in Africa: a systematic review. *J Affect Disord* 2010;123(1):17-29.
8. Orr ST, Reiter JP, Blazer DG, *et al.* Maternal prenatal pregnancy-related anxiety and spontaneous preterm birth in Baltimore, Maryland. *Psychosom Med* 2007;69(6):566-70.
9. Zachariah R. Social support, life stress, and anxiety as predictors of pregnancy complications in low-income women. *Res Nurs Health* 2009;32(4):391-404.
10. Huizink AC, Mulder EJH, Robles de Medina PG, *et al.* Is pregnancy anxiety a distinctive syndrome? *Early Hum Dev* 2004;79:81-91.

- 1  
2  
3 11. Bayrampour H, Ali E, McNeil DA, et al. Pregnancy-related anxiety: A concept analysis. *Int J*  
4  
5 *Nurs Studies* 2016;55(2016):115-30.  
6  
7  
8 12. Cote-Arsenault D. The influence of perinatal loss on anxiety in multigravidas. *J Obstet*  
9  
10 *Gynecol Neonatal Nurs* 2003;32(5):623-29.  
11  
12  
13 13. Levin JS. The factor structure of pregnancy anxiety scale. *J Health Soc Behav*  
14  
15 1991;32(4):368-81.  
16  
17  
18 14. Rini CK, Dunkel-Schetter C, Wadhwa PD, et al. Psychological adaptation and birth  
19  
20 outcomes: the role of personal resources, stress and sociocultural context in pregnancy.  
21  
22 *Health Psychol* 1999;18(4):333-45.  
23  
24  
25 15. Theut SK, Pedersen FA, Zaslow MJ, et al. Pregnancy subsequent to perinatal loss: parental  
26  
27 anxiety and depression. *J Am Acad Child Adolesc Psychiatry* 1988;27(3):289-92.  
28  
29  
30 16. Wadhwa PD, Sandman CA, Porto M, et al. The association between prenatal stress and  
31  
32 infant birthweights and gestational age at birth: a prospective investigation. *Am J Obstet*  
33  
34 *Gynecol* 1993;169(4):858-65.  
35  
36  
37 17. World Health Organization [Internet]. Maternal mortality fact sheet. Geneva: World Health  
38  
39 Organization; 2014. Available from <http://www.who.int/mediacentre/factsheets/fs348/en/>  
40  
41 [accessed 12 September 2014]  
42  
43  
44 18. World Health Organization [Internet]. Born too soon: The global action report on preterm  
45  
46 birth. Geneva: World Health Organization; 2012. Available from  
47  
48 [http://www.who.int/pmnch/media/news/2012/preterm\\_birth\\_report/en/](http://www.who.int/pmnch/media/news/2012/preterm_birth_report/en/) (accessed 20 March  
49  
50 2014)  
51  
52  
53  
54  
55  
56  
57  
58  
59  
60

- 1  
2  
3 19. Hanlon C, Whitley R, Wondimagegn D *et al.* Between life and death: exploring the  
4 sociocultural context of antenatal mental distress in rural Ethiopia. *Arch Womens Ment*  
5  
6 *Health* 2010;13(5):385-93.  
7  
8
- 9  
10 20. Dhai A, Noble R. Ethical issues in HIV. *Best Pract Res Clin Obstet Gynaecol*  
11  
12 2005,19(2):255-67.  
13  
14
- 15 21. Converse M. Philosophy of phenomenology: how understanding aids research. *Nurs Res*  
16  
17 2012;20(1):28-32.  
18  
19
- 20 22. Dowling M. From Husserl to van Manen: a review of different phenomenological  
21  
22 approaches. *Int J Nurs Stud* 2007;44(1):131-42.  
23  
24
- 25 23. Rodgers BL. Developing nursing knowledge: philosophical traditions and influences.  
26  
27 Philadelphia, PA: Lippincott, Williams and Wilkins 2005.  
28
- 29 24. Morse JM. Critical analysis of strategies for determining rigor in qualitative inquiry. *Qual*  
30  
31 *Health Res* 2015;25(9):1212-22.  
32  
33
- 34 25. Premji SS, Nyanza EC, Riziki P. Psychosocial health of women in Mwanza City: Pregnancy-  
35  
36 related anxiety, depression, and preterm birth. University Research Grants Committee, Seed  
37  
38 Grant Application. Calgary, AB: Author 2013.  
39  
40
- 41 26. Fairlie TG, Gillan MW, Rich-Edwards J. High pregnancy-related anxiety and prenatal  
42  
43 depressive symptoms as predictors of intention to breastfeed and breastfeeding initiation. *J*  
44  
45 *Womens Health* 2009;18(7):945-53.  
46  
47
- 48 27. Streubert HJ, Carpenter DR. Qualitative research in nursing: advancing the humanistic  
49  
50 imperative (5<sup>th</sup> ed.). Philadelphia, PA: Lippincott, Williams and Wilkins 2011.  
51  
52
- 53 28. Knaack P. Phenomenological research. *West J Nurs Res* 1984;6(1):107-14.  
54  
55  
56  
57  
58  
59  
60

- 1  
2  
3 29. Loiselle CG, Profetto-McGrath J, Polit DF, *et al.* Canadian essentials of nursing research (3<sup>rd</sup>  
4 ed.). Philadelphia, PA: Lippincott Williams & Wilkins 2011.  
5  
6  
7  
8 30. Mathison S. Why triangulate? *Educ Res* 1988;17(2):13-7.  
9  
10 31. Patton MQ. Qualitative evaluation and research methods (3<sup>rd</sup> ed.). Thousand Oaks, CA: Sage  
11 Publications 2002.  
12  
13 32. Rahman A, Fisher J, Bower P, *et al.* Interventions for common perinatal mental disorders in  
14 women in low- and middle- income countries: a systematic review and meta-analysis. *Bull*  
15 *World Health Organ* 2012;91(8):593-601.  
16  
17 33. Brunton RJ, Dryer R, Saliba A, *et al.* Pregnancy anxiety: a systematic review of current  
18 scales. *J Affect Disord* 2015;176:24-34.  
19  
20 34. Somerville S, Dedman K, Hagan R, *et al.* The perinatal anxiety screening scale: development  
21 and preliminary validation. *Arch Womens Ment Health* 2014;17(5):443-54.  
22  
23 35. Rwakarema M, Premji SS, Nyanza EC, *et al.* Antenatal depression is associated with  
24 pregnancy-related anxiety, partner relations, and wealth in women in Northern Tanzania: a  
25 cross-sectional study. *BMC Womens Health* 2015;15:68.  
26  
27 36. Sawyer A, Ayers S, Smith H. Pre- and postnatal psychological wellbeing in Africa: a  
28 systematic review. *J Affect Disord* 2010;123(1):17-29.  
29  
30 37. Esimai OA, Fatoye FO, Quiah AG, *et al.* Antepartum anxiety and depressive symptoms: a  
31 study of Nigerian women during the three trimesters of pregnancy. *J Obstet Gynaecol*  
32 2008;28(2):202-03.  
33  
34 38. Lazarus RS. Coping theory and research: Past, present, and future. *Psychosom Med*  
35 1993;55:234-47.  
36  
37  
38  
39  
40  
41  
42  
43  
44  
45  
46  
47  
48  
49  
50  
51  
52  
53  
54  
55  
56  
57  
58  
59  
60

- 1  
2  
3  
4  
5  
6  
7  
8  
9  
10  
11  
12  
13  
14  
15  
16  
17  
18  
19  
20  
21  
22  
23  
24  
25  
26  
27  
28  
29  
30  
31  
32  
33  
34  
35  
36  
37  
38  
39  
40  
41  
42  
43  
44  
45  
46  
47  
48  
49  
50  
51  
52  
53  
54  
55  
56  
57  
58  
59  
60
39. Hamilton JG, Lobel M. Types, patterns, and predictors of coping with stress during pregnancy: examination of the Revised Prenatal Coping Inventory in a diverse sample. *J Psychosom Obstet Gynaecol* 2008;29(2):97-104.
40. Lazarus RS, Folkman S. Stress, appraisal, and coping. New York: Springer 1984.
41. Tuncay T. Spirituality in coping with HIV/AIDS. *HIV/AIDS Review* 2007;8(34):10-5
42. Glas G. Anxiety, Anxiety Disorders, Religion and Spirituality. *South Med J* 2007;100(6):621-25.
43. Mann JR, Mannan J, Quinones LA, *et al.* Religion, Spirituality, Social Support, and Perceived Stress in Pregnancy and Postpartum Hispanic Women. *J Obstet Gynecol Neonat Nurs* 2008;39(6):645-57.
44. Steglitz J, Ng R, Mosha J, *et al.* Divinity and Distress: the Impact of Religion and Spirituality on the Mental Health of HIV-Positive Adults in Tanzania. *AIDS Behav* 2012;16(8):2392-98.
45. Cabieses B, Bird P. Glossary of access to health care and related concepts for low- and middle-income countries (LMICs): a critical review of international literature. *Int J Health Serv* 2014;44(4):845-61.
46. Exavery A, Kante AM, Hingora A, *et al.* How mistimed and unwanted pregnancies affect timing of antenatal care initiation in three districts in Tanzania. *BMC Pregnancy Childbirth* 2013;13(1):35.
47. Nyamtema AS, Jong AB, Urassa DP, *et al.* The quality of antenatal care in rural Tanzania: what is behind the number of visits? *BMC Pregnancy Childbirth* 2012;12(1):70-8.
48. Aaron E, Bonacquisti MS, Geller PA *et al.* Perinatal depression and anxiety in women with and without Human Immunodeficiency Virus Infection. *Womens Health Issues* 2015;25(5):579-85.

**APPENDIX**

## Interview Questions

1. Can you tell me about your experience so far in this pregnancy? Or Can you tell me about your experience while you were pregnant?
2. Tell me about a time during your pregnancy where you felt especially worried or concerned?
3. Tell me what worries you most about labour and delivery.
4. Tell me about a time when your worries were overwhelming or difficult to handle.
5. Tell me about how you would manage your worries at times when you felt especially worried.
6. What is the biggest concern you have about your pregnancy?
7. What is the biggest concern you have about the child?
8. What does it mean to you to have worries during your pregnancy?
9. Can you give me an example of a time where your worries affected your activities?
10. Can you give me an example of a time when your worries were relieved by a person or event? Or a time when your worries were not relieved?
11. Can you tell me what provided you with the most reassurance when you had concerns?
12. Can you tell me about any aspects of your relationship that have had an effect your worries?
13. Can you tell me about any aspects of your family or friends that have had an effect on your worries?

## COREQ (CONsolidated criteria for REporting Qualitative research) Checklist

A checklist of items that should be included in reports of qualitative research. You must report the page number in your manuscript where you consider each of the items listed in this checklist. If you have not included this information, either revise your manuscript accordingly before submitting or note N/A.

| Topic                                          | Item No. | Guide Questions/Description                                                                                                                              | Reported on Page No. |
|------------------------------------------------|----------|----------------------------------------------------------------------------------------------------------------------------------------------------------|----------------------|
| <b>Domain 1: Research team and reflexivity</b> |          |                                                                                                                                                          |                      |
| <i>Personal characteristics</i>                |          |                                                                                                                                                          |                      |
| Interviewer/facilitator                        | 1        | Which author/s conducted the interview or focus group?                                                                                                   |                      |
| Credentials                                    | 2        | What were the researcher's credentials? E.g. PhD, MD                                                                                                     |                      |
| Occupation                                     | 3        | What was their occupation at the time of the study?                                                                                                      |                      |
| Gender                                         | 4        | Was the researcher male or female?                                                                                                                       |                      |
| Experience and training                        | 5        | What experience or training did the researcher have?                                                                                                     |                      |
| <i>Relationship with participants</i>          |          |                                                                                                                                                          |                      |
| Relationship established                       | 6        | Was a relationship established prior to study commencement?                                                                                              |                      |
| Participant knowledge of the interviewer       | 7        | What did the participants know about the researcher? e.g. personal goals, reasons for doing the research                                                 |                      |
| Interviewer characteristics                    | 8        | What characteristics were reported about the interviewer/facilitator? e.g. Bias, assumptions, reasons and interests in the research topic                |                      |
| <b>Domain 2: Study design</b>                  |          |                                                                                                                                                          |                      |
| <i>Theoretical framework</i>                   |          |                                                                                                                                                          |                      |
| Methodological orientation and Theory          | 9        | What methodological orientation was stated to underpin the study? e.g. grounded theory, discourse analysis, ethnography, phenomenology, content analysis |                      |
| <i>Participant selection</i>                   |          |                                                                                                                                                          |                      |
| Sampling                                       | 10       | How were participants selected? e.g. purposive, convenience, consecutive, snowball                                                                       |                      |
| Method of approach                             | 11       | How were participants approached? e.g. face-to-face, telephone, mail, email                                                                              |                      |
| Sample size                                    | 12       | How many participants were in the study?                                                                                                                 |                      |
| Non-participation                              | 13       | How many people refused to participate or dropped out? Reasons?                                                                                          |                      |
| <i>Setting</i>                                 |          |                                                                                                                                                          |                      |
| Setting of data collection                     | 14       | Where was the data collected? e.g. home, clinic, workplace                                                                                               |                      |
| Presence of non-participants                   | 15       | Was anyone else present besides the participants and researchers?                                                                                        |                      |
| Description of sample                          | 16       | What are the important characteristics of the sample? e.g. demographic data, date                                                                        |                      |
| <i>Data collection</i>                         |          |                                                                                                                                                          |                      |
| Interview guide                                | 17       | Were questions, prompts, guides provided by the authors? Was it pilot tested?                                                                            |                      |
| Repeat interviews                              | 18       | Were repeat interviews carried out? If yes, how many?                                                                                                    |                      |
| Audio/visual recording                         | 19       | Did the research use audio or visual recording to collect the data?                                                                                      |                      |
| Field notes                                    | 20       | Were field notes made during and/or after the interview or focus group?                                                                                  |                      |
| Duration                                       | 21       | What was the duration of the interviews or focus group?                                                                                                  |                      |
| Data saturation                                | 22       | Was data saturation discussed?                                                                                                                           |                      |
| Transcripts returned                           | 23       | Were transcripts returned to participants for comment and/or                                                                                             |                      |



| Topic                                  | Item No. | Guide Questions/Description                                                                                                        | Reported on Page No. |
|----------------------------------------|----------|------------------------------------------------------------------------------------------------------------------------------------|----------------------|
|                                        |          | correction?                                                                                                                        |                      |
| <b>Domain 3: analysis and findings</b> |          |                                                                                                                                    |                      |
| <i>Data analysis</i>                   |          |                                                                                                                                    |                      |
| Number of data coders                  | 24       | How many data coders coded the data?                                                                                               |                      |
| Description of the coding tree         | 25       | Did authors provide a description of the coding tree?                                                                              |                      |
| Derivation of themes                   | 26       | Were themes identified in advance or derived from the data?                                                                        |                      |
| Software                               | 27       | What software, if applicable, was used to manage the data?                                                                         |                      |
| Participant checking                   | 28       | Did participants provide feedback on the findings?                                                                                 |                      |
| <i>Reporting</i>                       |          |                                                                                                                                    |                      |
| Quotations presented                   | 29       | Were participant quotations presented to illustrate the themes/findings?<br>Was each quotation identified? e.g. participant number |                      |
| Data and findings consistent           | 30       | Was there consistency between the data presented and the findings?                                                                 |                      |
| Clarity of major themes                | 31       | Were major themes clearly presented in the findings?                                                                               |                      |
| Clarity of minor themes                | 32       | Is there a description of diverse cases or discussion of minor themes?                                                             |                      |

Developed from: Tong A, Sainsbury P, Craig J. Consolidated criteria for reporting qualitative research (COREQ): a 32-item checklist for interviews and focus groups. *International Journal for Quality in Health Care*. 2007. Volume 19, Number 6: pp. 349 – 357

**Once you have completed this checklist, please save a copy and upload it as part of your submission. DO NOT include this checklist as part of the main manuscript document. It must be uploaded as a separate file.**

# BMJ Open

## A small qualitative study of pregnancy-related anxiety among women in Tanzania

|                                 |                                                                                                                                                                                                                                                                                                                                                                                                                                                                                                     |
|---------------------------------|-----------------------------------------------------------------------------------------------------------------------------------------------------------------------------------------------------------------------------------------------------------------------------------------------------------------------------------------------------------------------------------------------------------------------------------------------------------------------------------------------------|
| Journal:                        | <i>BMJ Open</i>                                                                                                                                                                                                                                                                                                                                                                                                                                                                                     |
| Manuscript ID                   | bmjopen-2017-016072.R1                                                                                                                                                                                                                                                                                                                                                                                                                                                                              |
| Article Type:                   | Research                                                                                                                                                                                                                                                                                                                                                                                                                                                                                            |
| Date Submitted by the Author:   | 31-May-2017                                                                                                                                                                                                                                                                                                                                                                                                                                                                                         |
| Complete List of Authors:       | Rosario, Melanie; University of Calgary, Faculty of Nursing<br>Premji, Shahirose; University of Calgary, Faculty of Nursing; University of Calgary Cumming School of Medicine, Community Health Sciences<br>Nyanza, Elias; Catholic University of Health and Allied Sciences, School of Public Health; University of Calgary Cumming School of Medicine, Community Health Sciences<br>Raffin, Shelley; University of Calgary, Nursing<br>Este, David; University of Calgary, Faculty of Social Work |
| <b>Primary Subject Heading</b>: | Global health                                                                                                                                                                                                                                                                                                                                                                                                                                                                                       |
| Secondary Subject Heading:      | Mental health, Public health, Qualitative research                                                                                                                                                                                                                                                                                                                                                                                                                                                  |
| Keywords:                       | PERINATOLOGY, PRIMARY CARE, Anxiety disorders < PSYCHIATRY, PUBLIC HEALTH, QUALITATIVE RESEARCH                                                                                                                                                                                                                                                                                                                                                                                                     |
|                                 |                                                                                                                                                                                                                                                                                                                                                                                                                                                                                                     |

SCHOLARONE™  
Manuscripts

1  
2  
3 **Title:** A small qualitative study of pregnancy-related anxiety among women in Tanzania  
4  
5  
6  
7

8 **Authors:** Melanie King Rosario<sup>1\*</sup>, Shahirose Sadrudin Premji<sup>1,2\*</sup> §, Elias Charles Nyanza<sup>2,3</sup>,  
9  
10 Shelley Raffin Bouchal<sup>1</sup>, David Este<sup>4</sup>  
11  
12  
13  
14

15 <sup>1</sup> Faculty of Nursing, University of Calgary, Calgary, AB, CANADA  
16

17 <sup>2</sup> Community Health Sciences, Cumming School of Medicine, University of Calgary, Calgary,  
18  
19 AB, CANADA  
20  
21

22 <sup>3</sup> School of Public Health, Catholic University of Health and Allied Sciences, Bugando Area,  
23  
24 Mwanza, Tanzania  
25  
26

27 <sup>4</sup> Faculty of Social Work, University of Calgary, Calgary, AB, CANADA  
28  
29  
30

31 \* Equal Authorship  
32

33 § Corresponding author  
34  
35  
36  
37  
38

39 **Correspondence to:**

40 Shahirose Premji  
41  
42

43 Faculty of Nursing, University of Calgary  
44

45 2500 University Drive NW  
46  
47

48 Calgary, Alberta, CANADA T2N 1N4  
49

50 Email: [premjis@ucalgary.ca](mailto:premjis@ucalgary.ca)  
51  
52

53 Tel: 403.220.4081  
54  
55  
56  
57  
58  
59  
60

1  
2  
3 **Keywords:** Pregnancy-related anxiety; anxiety; women's health; pregnancy; global health  
4

5 **Word count:** 5,005  
6  
7  
8  
9  
10  
11  
12  
13  
14  
15  
16  
17  
18  
19  
20  
21  
22  
23  
24  
25  
26  
27  
28  
29  
30  
31  
32  
33  
34  
35  
36  
37  
38  
39  
40  
41  
42  
43  
44  
45  
46  
47  
48  
49  
50  
51  
52  
53  
54  
55  
56  
57  
58  
59  
60

For peer review only

## ABSTRACT

**Objectives:** To explore and understand the experiences and priorities of pregnant women living with fears and worries related to fetal/infant and maternal health, the birthing process, and ability to parent the infant (i.e., pregnancy-related anxiety; PRA) in Mwanza, Tanzania.

**Design:** Descriptive phenomenological approach.

**Setting:** Two clinics in the Ilemela and Nyamagana districts of Mwanza.

**Participants:** Pregnant and postpartum women who obtained high scores on a PRA scale during pregnancy in a larger quantitative study were contacted to participate in an interview (10 women, aged 18-34 years; 3 HIV positive).

**Measures:** Semi-structured interviews were undertaken, with guiding questions related to the women's experience during pregnancy. The Colaizzi method was utilized with transcripts that had been translated and back translated from Swahili to English and then hand-coded by the interviewer, with independent review by another researcher to verify the analysis.

**Results:** PRA, as experienced by women in Mwanza, was a state of worry and concern, often causing physical symptoms, and disrupting personal sense of peace. While some themes in the women's experiences reflected the domains examined in the PRA scale used to identify potential participants, others such as lack of knowledge, partner relationship, interactions with the health care system, spirituality, and fear of HIV/AIDS were otherwise missing. Their prominence in the participants' stories broadens our understanding of PRA.

**Conclusions:** The realities and viewpoints of women in low- and middle-income countries (LMIC) experiencing PRA are still relatively unknown. The findings from this study provided much-needed insight into the perspectives and priorities of women in Mwanza who have experienced PRA and further support the need to explore this phenomenon in other LMIC. The

1  
2  
3 additional domains identified reinforce the need for a PRA tool that accurately and adequately  
4 capture the complexities of PRA for women in this region.  
5  
6  
7  
8  
9

## 10 **ARTICLE SUMMARY**

### 11 **Strengths and limitations of this study**

- 12  
13  
14  
15 • Partnerships with the local university in Mwanza allowed involvement and collaboration  
16 with local health professionals in the development of the method, recruitment, and data  
17 collection processes.  
18  
19  
20  
21
- 22 • Extensive international clinical and research experience by the researcher and supervisor  
23 was instrumental in creating relationships and opportunities for genuine interaction and  
24 conversation to ensure that the data collection and analysis process incorporated the voice  
25 of the women, local context, and culture.  
26  
27  
28  
29
- 30 • This is the first qualitative study of the experiences of women who have experienced  
31 PRA in Tanzania.  
32  
33  
34  
35
- 36 • The exclusion criterion was amended to include early postpartum women as many  
37 women from the associated quantitative study began to deliver before recruitment had  
38 been completed. While we acknowledge this alteration in the study design as a potentially  
39 significant limitation, postpartum women demonstrated the ability to draw from their  
40 experience during pregnancy and their stories were rich with detail.  
41  
42  
43  
44
- 45 • The stigma of mental illness and presence of a local third party (translator) may have  
46 affected the level of participation, engagement, or willingness of women to participate in  
47 the interviews.  
48  
49  
50  
51  
52  
53  
54  
55  
56  
57  
58  
59  
60

1  
2  
3  
4  
5  
6  
7  
8  
9  
10  
11  
12  
13  
14  
15  
16  
17  
18  
19  
20  
21  
22  
23  
24  
25  
26  
27  
28  
29  
30  
31  
32  
33  
34  
35  
36  
37  
38  
39  
40  
41  
42  
43  
44  
45  
46  
47  
48  
49  
50  
51  
52  
53  
54  
55  
56  
57  
58  
59  
60

- Due to time constraints, it was not feasible to return to the participants to present initial findings and collect feedback, as per Colaizzi’s method.

For peer review only

## INTRODUCTION

Pregnancy-related anxiety (PRA) has been strongly linked to preterm births, pregnancy complications, and negative infant outcomes in research from many high-income countries.[1-9] PRA is a syndrome that is distinct from depression, stress, or generalized anxiety.[10, 11] PRA encompasses several dimensions including fears and worries about the health and survival of the unborn child, having an ‘abnormal’ baby, the birthing process, developing medical problems during pregnancy, and ability to parent and care for the infant following birth.[10-16] In low- and middle-income countries (LMIC), the presence and impact of PRA will be even more pronounced given the high maternal and child mortality rates, poverty, and lack of resources.



1  
2  
3 In 2012, women in LMIC had a 1 in 150 risk of dying from complications in childbirth or  
4 pregnancy; this was in sharp contrast to a risk of 1 in 3800 for women in high-income  
5 countries.[17] In 2012, Canada reported 555 infants deaths due to complications from preterm  
6 birth, which is the greatest cause of neonatal deaths globally, whereas Tanzania reported over  
7 17,000.[18]  
8  
9  
10  
11  
12  
13  
14  
15  
16  
17

18 Despite the potential harm of PRA in women from LMIC, their realities and viewpoints are  
19 relatively unknown, as qualitative studies to date have explored the broad phenomenon of  
20 antenatal mental distress in Ethiopia[19], and Malawi[20], rather than the more specific focus of  
21 PRA. Other qualitative studies such as a study from Ghana[21] have examined anxiety and fears  
22 situated in sociocultural beliefs, perceptions, and knowledge, which provide insight into the  
23 affective responses of pregnant women who are anxious.[11] The essence of PRA as experienced  
24 in the reality of pregnant women in LMIC is overshadowed by more widely recognized mental  
25 health concerns such as postpartum depression.  
26  
27  
28  
29  
30  
31  
32  
33  
34  
35  
36  
37  
38

39 Attempts to transfer evidence from high-income countries to inform programs or initiative in  
40 LMIC, without alterations for cultural and contextual relevancy, have often proven to be  
41 unsuccessful, if not problematic.[22] In an effort to address the lack of knowledge about PRA in  
42 LMIC, this study explored the concept of PRA through the lived experience of pregnant women  
43 living in Mwanza, Tanzania. A Husserlian lens of phenomenology was integral in exploring the  
44 essence of PRA from the life-world of the participants rather than the imposition of the  
45 researcher [23]. Merging the researcher's perspectives with that of the participants' lived  
46 experienced, that is applying Heideggerian lens of phenomenology, was problematic and  
47  
48  
49  
50  
51  
52  
53  
54  
55  
56  
57  
58  
59  
60

1  
2  
3 counter-productive given the unique geographical, cultural, and contextual elements within the  
4  
5 participant's experiences and environment [24, 25]. We present major themes in the participants'  
6  
7 stories that did not reflect the domains of the PRA scale as it reflects the range of anxiety  
8  
9 symptoms experienced by pregnant women in LMIC. We incorporate culture and context to  
10  
11 understand the meaning given by the participants to the PRA experiences that have taken place.  
12  
13  
14

## 15 16 17 **METHODS**

18  
19 Women's experience of PRA was explored through the Husserlian lens of descriptive  
20  
21 phenomenology[23-25] rather than a Heideggerian interpretive approach.[23] A reflective  
22  
23 journal, commenced prior to starting the study and maintained throughout the study process,  
24  
25 enabled the researcher (MKR) to recognize and set aside presuppositions, judgments, beliefs,  
26  
27 experiences, and perceptions [26]. As such, bracketing permitted reducing the experience to the  
28  
29 essence of PRA as experienced by women in Mwanza, free from conscious interpretation and  
30  
31 researchers' influence.[23-25] Important elements of the participants' experiences—gender  
32  
33 related inequities, low literacy, low education, and lack of decision-making authority—were  
34  
35 clarified through field notes and peer debriefing.[25, 27] Peer debriefing, which occurred at the  
36  
37 conclusion of each interview, enabled verification of local cultural nuances by 'cultural insiders'  
38  
39 thereby minimizing personal or cultural bias [28]. To further enhance credibility, we  
40  
41 acknowledged the community—employees and students at the Catholic University of Health and  
42  
43 Allied Sciences office, local personnel (e.g., shopkeepers, taxi drivers, and neighbours)—as  
44  
45 arbitrators of quality in discussing elements of local context and their meaning, as well as  
46  
47 returning to raw data[28].  
48  
49  
50  
51  
52  
53  
54  
55  
56  
57  
58  
59  
60

### Setting and participants

The study sample was obtained from a quantitative study underway to examine the individual and collective contribution of PRA and depression in the prediction of preterm birth and postpartum depression.[29] The quantitative study recruited pregnant women from antenatal clinics in the Ilemela and Nyamagana districts of Mwanza, Tanzania. The clinic provided care to 40 to 50 women daily; 40% of these women deliver at hospitals and health centres that provide maternal and child health and delivery facilities.[29]

Purposive sampling was employed to identify women (a) 18 to 34 weeks' gestation, (b) able to speak English or Swahili, and (c) with high scores on the 10-item PRA scale,[14] which assesses fetal health, loss of fetus, childbirth, mother's wellbeing, parenting, and control/confidence.[11, 14] Eligible scores from the PRA with 4-point Likert scale were determined using Fairlier and colleagues'[30] recommendations of three or more responses indicating high anxiety. As research staff reviewed records of women enrolled in the quantitative study, they identified and contacted eligible participants. The potential pool of participants was smaller than anticipated, as contacting women after they had left the clinic proved challenging and women began to deliver. Through a consultative process with the research team of the quantitative study, and approved by ethics, the sample included pregnant and postpartum women with (1) high-anxiety with three or more responses indicating high anxiety, (2) two high anxiety and at least two moderate anxiety responses, or (3) one high anxiety and at least three moderate anxiety responses. Recruitment was ongoing as interviews took place; repetition of discovered information and confirmation of data that had been previously collected was achieved after 10 interviews, indicating data saturation.[31]

## Data collection

A research associate inquired via direct telephone interaction, using a standard script in Swahili, about women's interest to participate in an interview in a private room at a familiar antenatal clinic. During the face-to-face contact, details about the study including purpose of study, time commitment, risks, benefits, privacy, consent, and voluntary nature of participation were shared prior to obtaining informed consent. A trained interviewer (MKR) conducted semi-structured interviews in the clinics in Mwanza from October to November of 2014. The interview guide (Appendix A) provided general questions to direct participants in a uniform manner; interviews were also participant directed and the interviewer took cues, probed, and requested further detail based on the information that was shared. Interviews were 40-75 minutes long, and were (a) conducted with the help of a Swahili translator, (b) audio-recorded with permission, (c) transcribed in Swahili, and (d) translated to English and back-translated to Swahili to ensure language equivalency. Field notes were maintained throughout the study and used to complement the interview data and emphasize the essence of the participants' experiences of PRA. Other sources of data included demographic information about the participants, which was obtained from the larger study to reduce participant burden.

## Analysis

The Colaizzi method, with the exception of the final step of validating data with the participants, guided the analytic process.[31, 32] Each audio recording and transcript was reviewed numerous times while reflecting on field observations (e.g., facial expressions, gestures, disposition).[31]

1  
2  
3 Bracketing continued during this process to set aside beliefs, preconceptions, and values and be  
4 fully immersed in the participants' descriptions. Significant statements and phrases that pertained  
5 to PRA were identified, extracted, compiled into a separate document, reviewed, and associated  
6 with a formulated meaning and assigned to a broad category, or theme.[31, 32] A second  
7 researcher (SP) verified the process and ensured consistency in the meanings derived from  
8 statements, referring to the raw data as needed.[33] Formulated meanings associated with each  
9 significant statement were organized into categories or unique structure of clusters of themes and  
10 incorporated together to create a specific thematic impression.[31, 32] After merging all themes,  
11 we compiled a thematic map and an exhaustive description of the phenomenon of PRA in  
12 Mwanza, Tanzania.[31] Participant names were anonymized using pseudonyms and participant  
13 numbers correlating to the quantitative study.  
14  
15  
16  
17  
18  
19  
20  
21  
22  
23  
24  
25  
26  
27  
28  
29  
30  
31

32 We examined consistency of qualitative data against the 10-items on the PRA scale. Cross  
33 verification or triangulation of data enabled examination of the phenomenon of PRA from  
34 multiple perspectives.[34, 35] An additional method of triangulation, peer debriefing, prevented  
35 bias and allowed alternate points of view to emerge in the understanding of local context and  
36 culture.[27] Peer debriefing occurred with the interpreter, members of the community,  
37 employees and students at the Catholic University of Health and Allied Sciences office, and  
38 community members, including shop keepers, taxi drivers, and neighbours. Although the PRA  
39 scale reflected participants' experience, additional domains of PRA were also identified. The  
40 prominence of these domains in the participants' stories is important in broadening the  
41 understanding of the phenomenon of PRA. We present these additional domains of PRA in the  
42 findings.  
43  
44  
45  
46  
47  
48  
49  
50  
51  
52  
53  
54  
55  
56  
57  
58  
59  
60

## Limitations

Enrolling women in postpartum period did not overly influence their ability to recall the experience of PRA as evident from the richness of the stories. Women were encouraged to reflect only on their experience during pregnancy. Noticeably, anxiety as a mental health concern was absent in women's narratives. Colleagues and research associates in Tanzania, rather than the participants' interview, related the social negative attitudes surrounding mental illness (e.g., work of evil spirits, possessed or bewitched). The stigma attributed to 'mental illness' and the presence of a translator may have affected the level of participation or engagement in the interviews.[36] The inability to return to the participants to validate the study findings is also acknowledged as a limitation.

## RESULTS

All of the women resided in semi-urban areas, urban areas, or rural areas with reasonable access to semi-urban centers in Mwanza. Women were aged between 18 to 34 years of age. Of the 10 women, 4 were pregnant at the time of the interview and 6 had already delivered. Seven of the women (70%) were multiparous, and 2 had previously experienced the death of a child. Most of the women (90%) indicated that they were married or cohabitating with the child's father. Three of the women were HIV positive. Levels of education varied from no schooling to higher levels of basic education. Participants' characteristics are presented in Table 1.

**Table 1.** Characteristics of participants

| Characteristics | N=10           |
|-----------------|----------------|
| Age             | 18 to 34 years |

|                                       |                               |
|---------------------------------------|-------------------------------|
| Marital Status                        |                               |
| • Single                              | 1                             |
| • Married or Cohabiting               | 9                             |
| Parity                                |                               |
| • Primiparous                         | 3                             |
| • Multiparous                         | 7                             |
| Previous Loss of Child                |                               |
| • No                                  | 8                             |
| • Yes                                 | 2                             |
| Pregnancy status at time of interview |                               |
| • Pregnant                            | 4 (16 to 36 weeks' gestation) |
| • Delivered                           | 6                             |
| HIV Status                            |                               |
| • Negative                            | 7                             |
| • Positive                            | 3                             |

Five themes, presented in Table 2, did not reflect domains of the PRA scale: knowledge and understanding, partner relationships, interactions with the health care system, spirituality, and fear of HIV/AIDS.

**Table 2.** Additional domains of pregnancy-related anxiety as detailed by participant narratives in Mwanza

| <b>Additional domains</b>                                                               | <b>Potential probes</b>                                                                   |
|-----------------------------------------------------------------------------------------|-------------------------------------------------------------------------------------------|
| Knowledge and understanding                                                             | I have a lot of fear because I don't have enough information.                             |
|                                                                                         | I am concerned (worried) because the health care provider could not give me information.  |
| Partner relationship                                                                    | I am worried because my partner is not around.                                            |
|                                                                                         | I worry about finances because my partner does not support me financially.                |
| Interactions with the health care system (including access to care and quality of care) | I am concerned about paying for transportation, medication or childcare to attend clinic. |
|                                                                                         | I am concerned that I may need additional care or medication that I can't afford.         |

|                                |                                                                                              |
|--------------------------------|----------------------------------------------------------------------------------------------|
|                                | I am worried that health care practitioners won't know how to help me.                       |
| Spirituality                   | I find relief from my worries when I pray or go to church.                                   |
|                                | Believing in God helps me to feel peace when I am fearful.                                   |
| Experience or fear of HIV/AIDS | I have a lot of fear because when I don't feel well as I think that I might be HIV positive. |
|                                | I have worries about my pregnancy because of my HIV status.                                  |

### Knowledge and understanding

Lack of knowledge, or understanding of what was *normal*, was an underlying issue in many of the worries participants had about pregnancy and taking care of a new baby. Berta disclosed

I get frantic at times because I know that my knowledge and understanding of what a baby might be suffering from is low. Currently she is active in my belly. But when she is born, she might cry at night and there is no one to help me learn what might be wrong with her. Mostly I will guess. But for the days and nights now, I worry what could happen to her because of me.

Margaret found herself asking people around her about symptoms she was experiencing. "For instance, last week I had very severe abdominal pain for about 3 hours; I could not sleep. People tell me that it is a normal situation." Neema experienced heightened anxiety as she could not understand her somatic symptoms explaining

I felt bad and I was ill. About my health, after seeing myself very thin since I was so often ill, though it [was] for all my pregnancies but in this one it was severe with a lot of stress...The feeling of body weakness and fatigability went throughout the pregnancy.

Both Neema and Margaret experienced symptoms that they feared might be attributed to HIV and were terrified that this might be the cause of their symptoms. Margaret "fail[ed] to eat" and



1  
2  
3 was “vomiting a lot,” while Neema “felt ill”, became “very thin,” and was overcome with  
4  
5 “weakness”, all of which contributed to the fear of having HIV. Neema explained, “I was tested  
6  
7 when I was about 8 months pregnant for HIV infection and I was fine, I was not infected. But all  
8  
9 those months, I thought I was.” Although both were tested and received results that they were not  
10  
11 HIV positive, their lack of knowledge of common somatic symptoms of pregnancy caused  
12  
13 significant distress.  
14  
15  
16  
17  
18  
19

### 20 **Partner relationships**

21  
22 Grace described the support her partner provided after she and their first child was diagnosed  
23  
24 with HIV as, “[he] didn’t disturb or humiliate me as for why he has no AIDS and we do, he  
25  
26 accepted us.” Grace kept on thinking of the current pregnancy “if all my children will be infected  
27  
28 how things would be. Even when I rest for a few days, about 3 or more days then the concerns  
29  
30 keep on coming back.” Neema candidly shared the worries caused as result of her husband:  
31  
32  
33

34 I don’t know what was the issue but they say some might hate you when you are  
35  
36 pregnant, I thought that was the reason. When you are in such situation and he comes  
37  
38 asking for sex, it is an issue. It was very difficult for me...maybe because he found me  
39  
40 often sick, maybe he was hurting inside...happiness diminishes, love fades away. I  
41  
42 thought he might have been seeing another woman. I don’t know, but at the late stages of  
43  
44 my pregnancy he became close, he changed and that was a relief.  
45  
46  
47  
48  
49

50  
51 There were participants who had longed for emotional support from their partners but were  
52  
53 unable to obtain it. Grace’s husband travelled frequently; she explained “as his work is that he  
54  
55 has to travel...he is often not at home...he does not stay at home most of the time. So it is not  
56  
57  
58  
59  
60

1  
2  
3 easy to tell him what happens to me every day.” Berta explained that at one point in her  
4  
5 pregnancy,  
6

7  
8 My partner took me to my parents’ place and left me there. No one would talk to me  
9  
10 without my husband there. Even visitors would only talk to my father. It was not like they  
11  
12 were coming for me, or to know how I feel or how I was doing. They had no time to ask  
13  
14 all that.  
15  
16

17  
18 Conversations with research associates revealed that women in Tanzania (or Tanzanians in  
19  
20 general) often do not discuss personal concerns with friends, or even family. Once Berta returned  
21  
22 from her parents’ place, she explained,  
23

24  
25 During that time [pregnancy] my husband was not around, he had travelled. We had poor  
26  
27 communication when he was away. Whenever I called, he was not reachable. At the time  
28  
29 he was away, I was already confused because [of] my situation and I needed him... but at  
30  
31 the time I couldn’t get through to him, I was very worried during that time.  
32  
33

34  
35  
36 For participants in this study, the notion of *support* was contextually and culturally defined as  
37  
38 financial support, as gleaned from peer debriefing. Aisha had moved to Mwanza from her rural  
39  
40 hometown, where weeks passed since her partner left. Aisha had little contact with the father of  
41  
42 her unborn child, and received little help when he did respond. “What gave me worries  
43  
44 was...there were times I...asked for support and he wouldn’t help me.” Aisha had moved to  
45  
46 Mwanza from her rural hometown, where weeks passed since her partner left. She recalled,  
47  
48 “During that time, when it happens that I face financial issues and I ask him for help and he  
49  
50 [father of the child] doesn’t respond, I was just ... crying. What if I needed medicine?”  
51  
52  
53  
54  
55  
56  
57  
58  
59  
60

### Interactions with the health care system

All participants in this study received antenatal care at least once during pregnancy. Margaret shared “I am used to calling the nurse whenever I get worse, I meet her and she helps me.”

Margaret would “do whatever the doctors instructed [her] to do” and found “I feel peace whenever I go to the hospital, since [she] gets advice from them to be well and keep [her] baby well.” Joyce also recalled positive interactions with health care providers; however, “what I see is, they [health care providers] are more supportive in this pregnancy, especially the nurses.

Whenever I face a problem they advise and help me.” However, some women experienced less favourable interactions. Berta recalled a stressful week in which numerous providers contradicted her diagnosis of “low blood” (a common term used to mean anemia—often women will know this phrase in English without the need for translation) and informed her “that I might fall down or deliver a dead baby or that is how all of my reproduction will be.” The worry in her voice and the expression on her face depicted even more than her words. Her voice grew shaky, her eyes began to water, and she fidgeted with her hands in her lap. Berta felt as though the interaction with health care providers had exacerbated her worries explaining:

So she didn't give me clear information or encourage me. I felt like she was adding on my problems since when I was trying more to get information from her, she said ‘There is this lady who came here with the same situation as yours’; I directed her, so let's find her, she can give reliable information. So herself as a nurse who was just advising me on my issue couldn't know where I could get help. So I feel she added on me a load in my thoughts.

1  
2  
3 Neema described a particularly difficult day in which she had arrived very early at clinic for  
4  
5 assessing high blood pressure. Reflecting on the process of taking number to receive service she  
6  
7 shared:  
8  
9

10 I came early and I was ill on that day. I was the fourth lady to arrive. At a time we were  
11  
12 provided with numbers I never knew, I had gone to the toilet and there were about 99  
13  
14 women in queue. I missed the number. The nurse refused to give me a number saying  
15  
16 ‘you were not around, there are people who were here early, you came late and you want  
17  
18 number.’ I shed tears, I was upset and sad, I felt bad and I was ill, I went into the room  
19  
20 where they take physical measures.  
21  
22  
23  
24  
25  
26

27 Sarah had waited a long time to become pregnant thus when the time finally came, “I wished to  
28  
29 see my stomach grows fast. I used to check up on myself every now and then I felt like my  
30  
31 stomach was not growing, so I felt worried...if the child was alive inside my womb.” Sarah  
32  
33 described frustration in being advised to stay on bed rest after experiencing bleeding in the first  
34  
35 trimester. She stated,  
36  
37

38 I don’t want to take the bed rest, though they advised me to, I figured out that I couldn’t  
39  
40 because I am working...I don’t have much time to stay at home [considering that] I  
41  
42 would have to take maternity leave after delivery. I was so worried, I was frustrated. That  
43  
44 was very hard for me.  
45  
46  
47

48 While routine prenatal care was provided free of charge in Mwanza,[29] strained relationships  
49  
50 with health care providers, the inability to access additional services or lost time at work, was an  
51  
52 underlying issue in many of the narratives.  
53  
54  
55  
56  
57  
58  
59  
60

## Spirituality

The women's spirituality permeated many conversations, often woven among the fears and concerns they expressed. Imara had 3 girls and felt worried as her sister-in-law's wanted their brother to marry another women who may be able to give birth to boys. She explained how her belief in God helped her to "take heart" (i.e., took courage) by thinking:

God is the one who provides, it is not like I am going to the market, that I choose I want this and that, no, I encouraged myself that God is the provider you can't say that I have only girls...I believe God knows more and I don't.

Wema's "biggest worry was death" because "I was swollen all over the body, especially my feet and it was painful all over...the doctor I was advice, there were no any other cause except for the pregnancy." Wema's sister-in-law died from pre-eclampsia. When asked how she managed to cope with her worries, Wema simply replied, "I only prayed to God...I just pass through; it reach a point I had to take heart, thought it was God's plans." Similarly, Berta believed that "God is the one who knows it all..." including her own future and if she "will deliver safely or not." Despite her struggles, Berta "was encouraged by being thankful to God in everything." Sarah had experienced particular anxiety that her stomach was not growing large enough to indicate that a healthy child lay inside. For Sarah aside from her husband "Honestly, my other help was from prayers only. When I pray I get peace of mind. I stopped worrying. I believed my stomach would get larger. So as much as we talked and prayer, I felt peace."

## Fear of HIV/AIDS

Fears of HIV/AIDS consumed the thoughts of the pregnant women who could not explain their somatic symptoms. Margaret explained that, "I was vomiting a lot, not eating well, it made me

1  
2  
3 have poor health and I became very thin. So I was thinking, I had not tested [for HIV] and I was  
4 very worried.” She described feeling scared “after seeing myself very thin, though it [was] for all  
5 my pregnancies but in this one it was severe with a lot of stress.” Neema, who also saw herself  
6 feeling thin and unwell, described,  
7  
8  
9  
10  
11

12 It was during my early pregnancy but the feeling of body weakness and fatigability went  
13 throughout the pregnancy, I was tested when I was about 8 months pregnant for HIV  
14 infection, I was fine, I was not infected. My worry was because I was often sick and had  
15 lost weight so much, so event that added in my thoughts.  
16  
17  
18  
19  
20  
21  
22  
23

24 The three HIV positive women had relatively recent diagnoses (within the past 3 years) were  
25 preoccupied with worries about their unborn child/infant, and concerns for their child’s future if  
26 they were to pass away. Grace talked about her reactions to her HIV positive diagnoses:  
27  
28  
29  
30

31 I was frightened and full of worries. I passed about three days without food since I had a  
32 lot of stress and thoughts, I was sad, I was worried and I cried so much. I never expected  
33 my baby be infected or even myself; I never knew until I became pregnant again and I  
34 found out that I was HIV infected together with my oldest child.  
35  
36  
37  
38  
39  
40

41 Grace also discussed her concerns about the antiretrovirals that she began taking during her  
42 pregnancy and their impact on her unborn child. She explained,  
43  
44

45 Those drugs were bringing me different conditions [side effects]. I felt like dizziness and  
46 was thinking was these drugs to protect the child who was in my womb? If they make me  
47 feel this way, and in other days, I even lack sleep, with these conditions will my child be  
48 alive? Will the drug help me? I was worried.  
49  
50  
51  
52  
53  
54  
55  
56  
57  
58  
59  
60

1  
2  
3 Joyce's initial "concern was perhaps my child would also get infected, I asked the doctors, they  
4 reassured me and I stopped worrying." However, the initial reassurance faded as she considered  
5 her own diagnosis and then explained, "Both of my parents died and relative from my husband's  
6 side know nothing...I am worrying of delivering a baby who is HIV infected and was wondering  
7 what if I die early, who would I leave my baby with?"  
8  
9  
10  
11  
12  
13  
14  
15  
16

## 17 DISCUSSION

18  
19 The PRA Scale[14] has been identified as an appropriate tool for examining the experience of  
20 PRA for women in high-income countries.[11,16] Nonetheless, there have been claims that this  
21 tool, along with others designed to examine this phenomenon, displays relatively narrow  
22 domains that may not reflect the essence of PRA experienced by women.[37, 38] Our study  
23 confirmed this assertion for women in LMIC, specifically in Mwanza. Lack of knowledge,  
24 partner relationships, interactions with the health care system, spirituality, and fear of HIV/AIDS  
25 are suggested as additional domains based on their strong presence in the narratives and themes  
26 derived from the participants' stories. Table 1 provides suggestions for associated prompts  
27 related to each of these domains based on the participants' stories. Together with the PRA scale,  
28 these prompts may assist in developing a comprehensive measurement scale that will more  
29 accurately depict the sociocultural context of life in LMIC, specifically Mwanza, and therefore  
30 more accurately assess and identify pregnant women who are experiencing PRA in this region.  
31  
32  
33  
34  
35  
36  
37  
38  
39  
40  
41  
42  
43  
44  
45  
46  
47  
48  
49

50 The literature on PRA[2-9] outlines the numerous adverse effects for both mother and baby;  
51 many of these consequences of PRA were echoed in the participants' narratives. Participants  
52 appreciated that "thinking too much" or worrying was *bad* for them, as well as the baby.  
53  
54  
55  
56  
57  
58  
59  
60

1  
2  
3 Partners/husband, friends, family, neighbours, and care providers informed these sentiments and  
4  
5 “advised that the more you keep on thinking, the more you risk your baby” or you “might get  
6  
7 miscarried or bear a child with weakness...don’t stress, you might worry much and lose your life  
8  
9 or the baby’s.” The stories of family, neighbours, and friends become increasingly valuable as a  
10  
11 source of information due to perceived lack of knowledge of healthcare professionals or lack of  
12  
13 trust in their advice.  
14  
15

16  
17  
18  
19  
20 In LMIC such as Mwanza, the use of the word *support* was complicated by poverty, as often  
21  
22 fathers/partners may continue to provide financial resources, exacerbating a woman's  
23  
24 dependency for survival, while providing little to no practical or emotional support.[39] There is  
25  
26 increasing evidence that mental health issues in women may be related to social circumstances,  
27  
28 including poverty, violence, and economic dependence.[40] The stories of the women in this  
29  
30 study are similar to previous studies that indicated the significance of financial supporting  
31  
32 women’s feelings of anxiety.[41]  
33  
34  
35

36  
37  
38 Mwanza, and Tanzania in general, remains a highly patriarchal society in which women are often  
39  
40 not given ownership of their decisions, including decisions regarding health and medical  
41  
42 care.[39] Research colleagues in Mwanza indicated that this might be due to any number of  
43  
44 issues, including inability to meet sexual needs, decreased ability to provide for the home, or the  
45  
46 partner’s stress about providing for another child. For many participants, these gender-based  
47  
48 realities of life influenced family roles, interactions, and emotional support mechanisms and  
49  
50 evoked feelings of frustration, anxiety, hopelessness, and resignation. Lack of perceived control  
51  
52 over a situation can effect an individual’s uncertainty and insecurity, often leading to increased  
53  
54  
55  
56  
57  
58  
59  
60



1  
2  
3 anxiety.[42] Nearly all of the women used spiritual-positive coping— religion, prayer, or belief  
4  
5 in a greater power or plan—to overcome distressing situations and their potential or actual  
6  
7 negative consequences.[43, 44] Spiritual-positive coping offers a framework to help individuals  
8  
9 make sense of the *bigger* life questions, placing the power of a situation on a greater entity. This  
10  
11 can have many effects, including a reduction of guilt and feelings of responsibility for a difficult  
12  
13 or unfortunate situation.[45] Spirituality may lower anxiety levels, increase feelings of security,  
14  
15 provide additional social support, and reduce worry.[46-48] Few studies have examined  
16  
17 spirituality and mental health in Africa, despite it being recognized as a significant aspect of  
18  
19 daily life in Tanzania.[48]  
20  
21  
22  
23  
24  
25  
26

27 In LMIC, financial constraints and multiple socio-political problems (e.g., poverty and economic  
28  
29 instability) that burden health care systems[49] contribute to worry and uncertainty throughout  
30  
31 pregnancy. For participants with access to care, the experience was at times disappointing due to  
32  
33 negative events endured with health care providers. In Tanzania, antenatal services are widely  
34  
35 available; however, quality of service and treatment remains an ongoing issue due to lack of  
36  
37 trained personnel, inadequate supplies and equipment, and poor implementation of antenatal  
38  
39 guidelines.[50, 51]  
40  
41  
42  
43  
44  
45

46 Three of the 10 participants were HIV-positive, yet HIV played a significant role in not only  
47  
48 their stories, but in the lives of many of the participants. Many non-HIV positive participants  
49  
50 expressed constant fear or anxiety about being diagnosed with HIV. Their worries did not  
51  
52 indicate a positive diagnosis, but rather the reality of living in a highly affected area, with a  
53  
54 heightened sense of the reality and risks of this illness. Women with HIV have higher anxiety  
55  
56  
57  
58  
59  
60

1  
2  
3 symptoms during pregnancy due to maternal fears related to perinatal transmission of HIV.[52]

4  
5 All three of the participants with HIV openly discussed the intense fear of their child having  
6  
7  
8 HIV.  
9

## 10 11 12 13 CONCLUSIONS

14  
15 How social processes, poverty, and culture informs mental health of women during pregnancy  
16  
17 remains unexplored.[2] The social, economic, and cultural realities of women residing in  
18  
19 Mwanza were exemplified in themes of lack of knowledge, partner relationship, interactions with  
20  
21 the health care system, spirituality, and fear of HIV/AIDS that emerged from the narratives of  
22  
23 women experiencing PRA. Our study provides insight in this regard and adds new knowledge  
24  
25 about the essence of PRA experienced by women in Mwanza, Tanzania. The PRA scale  
26  
27 appropriately explicates participants' fear, worries, and concerns related to their own health and  
28  
29 survival during pregnancy, their infants' health during pregnancy and survival, as well as  
30  
31 caregiving ability in the postpartum. The PRA scale, however, narrowly reflects domains that  
32  
33 inform our understanding of PRA of women in Mwanza, Tanzania and perhaps other LMIC.  
34  
35  
36  
37  
38  
39

40  
41 **Contributions:** MKR and SSP developed the research question, designed the study, participated  
42  
43 in data analysis and drafted the manuscript. ECN coordinated efforts in Mwanza, including  
44  
45 translating documents, obtaining ethics approval, and coordinating local assistants. SRB and DE  
46  
47 provided consultation from the research design through to the manuscript development. All  
48  
49 authors have contributed to the work and approved the manuscript.  
50  
51

52  
53 **Funding:** The University of Calgary Research Grant (URGC) Program, SEED Grant, funded the  
54  
55 larger quantitative study. MRK's graduate studies was support by scholarships including Alberta  
56  
57  
58  
59  
60

1  
2  
3 Graduate Student Scholarship, Charlotte Firth Memorial Graduate Scholarship in Community  
4 Health Nursing, Education for the Future Master of Nursing Scholarship, and the Queen  
5 Elizabeth II Graduate Scholarship.  
6  
7  
8  
9

10 **Acknowledgments:** The authors are most grateful to the women who participated in this study  
11 and bravely told their stories. The collaboration and contributions of the Catholic University of  
12 Health and Allied Sciences in Mwanza are also acknowledged, as well as the research associates,  
13 assistants, and translators, particularly Dr. Ola Jahanpour and Miss Audrey Bernard. We thank  
14 Jill Norris for technical writing assistance.  
15  
16  
17  
18  
19  
20  
21

22 **Competing interests:** None declared.  
23

24 **Ethics approval:** University of Calgary Conjoint Health Research Ethics Board (REB13-0399:  
25 larger study; REB14-0660: this study; and REB14-0660-MOD-1: to include postpartum women)  
26 and the Catholic University of Health and Allied Sciences.  
27  
28  
29  
30

31 **Data sharing statement:** There are ethical restrictions that prohibit us from making data  
32 publicly available. We do not have permission from the participants to share all the interview  
33 data stemming from this study, especially the transcripts from the interviews. During the  
34 informed consent process, we indicated that the data would be shared in aggregate.  
35  
36  
37  
38  
39  
40  
41  
42  
43  
44  
45  
46  
47  
48  
49  
50  
51  
52  
53  
54  
55  
56  
57  
58  
59  
60

## REFERENCES

1. Azar R, Singer S. Maternal prenatal state anxiety symptoms and birth weight: a pilot study. *Cent Eur J Med* 2012;7(6):747-52.
2. Dunkel Schetter C. Psychological science on pregnancy: stress processes, biopsychosocial models, and emerging research issues. *Annu Rev Psychol* 2011;62(1):531-58.
3. Dunkel Schetter C, Tanner L. Anxiety, depression and stress in pregnancy: implications for mothers, children, research, and practice. *Curr Opin Psychiatry* 2012;25(2):141-48.
4. Gurung RAR, Dunkel Schetter C, Collins N, Rini C, Hobel CJ. Psychosocial predictors of prenatal anxiety. *J Soc Clin Psychol* 2005;24(4):497-519.
5. Lobel M, Cannella DL, DeVincent C, *et al.* Pregnancy-specific stress, prenatal health behaviors, and birth outcomes. *Health Psychol* 2008;27(5):604-15.
6. Mancuso RA, Dunkel Schetter C, Rink CM, *et al.* Maternal prenatal anxiety and corticotropin-releasing hormone associated with timing of delivery. *Psychosom Med* 2004;66(5):762-69.
7. Sawyer A, Ayers S, Smith H. Pre- and postnatal psychological wellbeing in Africa: a systematic review. *J Affect Disord* 2010;123(1):17-29.
8. Orr ST, Reiter JP, Blazer DG, *et al.* Maternal prenatal pregnancy-related anxiety and spontaneous preterm birth in Baltimore, Maryland. *Psychosom Med* 2007;69(6):566-70.
9. Zachariah R. Social support, life stress, and anxiety as predictors of pregnancy complications in low-income women. *Res Nurs Health* 2009;32(4):391-404.
10. Huizink AC, Mulder EJH, Robles de Medina PG, *et al.* Is pregnancy anxiety a distinctive syndrome? *Early Hum Dev* 2004;79:81-91.

- 1  
2  
3 11. Bayrampour H, Ali E, McNeil DA, et al. Pregnancy-related anxiety: A concept analysis. *Int J*  
4  
5  
6  
7  
8  
9  
10  
11  
12  
13  
14  
15  
16  
17  
18  
19  
20  
21  
22  
23  
24  
25  
26  
27  
28  
29  
30  
31  
32  
33  
34  
35  
36  
37  
38  
39  
40  
41  
42  
43  
44  
45  
46  
47  
48  
49  
50  
51  
52  
53  
54  
55  
56  
57  
58  
59  
60  
11. Bayrampour H, Ali E, McNeil DA, et al. Pregnancy-related anxiety: A concept analysis. *Int J Nurs Studies* 2016;55(2016):115-30.
12. Cote-Arsenault D. The influence of perinatal loss on anxiety in multigravidas. *J Obstet Gynecol Neonatal Nurs* 2003;32(5):623-29.
13. Levin JS. The factor structure of pregnancy anxiety scale. *J Health Soc Behav* 1991;32(4):368-81.
14. Rini CK, Dunkel-Schetter C, Wadhwa PD, et al. Psychological adaptation and birth outcomes: the role of personal resources, stress and sociocultural context in pregnancy. *Health Psychol* 1999;18(4):333-45.
15. Theut SK, Pedersen FA, Zaslow MJ, et al. Pregnancy subsequent to perinatal loss: parental anxiety and depression. *J Am Acad Child Adolesc Psychiatry* 1988;27(3):289-92.
16. Wadhwa PD, Sandman CA, Porto M, et al. The association between prenatal stress and infant birthweights and gestational age at birth: a prospective investigation. *Am J Obstet Gynecol* 1993;169(4):858-65.
17. World Health Organization [Internet]. Maternal mortality fact sheet. Geneva: World Health Organization; 2014. Available from <http://www.who.int/mediacentre/factsheets/fs348/en/> [accessed 12 September 2014]
18. World Health Organization [Internet]. Born too soon: The global action report on preterm birth. Geneva: World Health Organization; 2012. Available from [http://www.who.int/pmnch/media/news/2012/preterm\\_birth\\_report/en/](http://www.who.int/pmnch/media/news/2012/preterm_birth_report/en/) (accessed 20 March 2014)

- 1  
2  
3 19. Hanlon C, Whitley R, Wondimagegn D *et al.* Between life and death: exploring the  
4 sociocultural context of antenatal mental distress in rural Ethiopia. *Arch Womens Ment*  
5  
6 *Health* 2010;13(5):385-93.  
7  
8
- 9  
10 20. Steward RC, Umar E, Gleadow-Ware S *et al.* Perinatal distress and depression in Malawi: an  
11 exploratory qualitative study of stressors, supports and symptoms. *Arch Womens Ment*  
12  
13 *Health* 2015;18(2):177-185.  
14  
15
- 16  
17 21. Dako-Gyeke P, Aikins M, Aryeetey R *et al.* The influence of socio-cultural interpretations of  
18 pregnancy threats on health-seeking behaviour among pregnancy women in Urban Accra,  
19  
20 Ghana. *BMC Pregnancy Childbirth* 2013;13:211.  
21  
22
- 23  
24 22. Dhali A, Noble R. Ethical issues in HIV. *Best Pract Res Clin Obstet Gynaecol*  
25  
26 2005;19(2):255-67.  
27  
28
- 29  
30 23. Converse M. Philosophy of phenomenology: how understanding aids research. *Nurs Res*  
31  
32 2012;20(1):28-32.  
33
- 34  
35 24. Dowling M. From Husserl to van Manen: a review of different phenomenological  
36  
37 approaches. *Int J Nurs Stud* 2007;44(1):131-42.  
38
- 39  
40 25. Rodgers BL. Developing nursing knowledge: philosophical traditions and influences.  
41  
42 Philadelphia, PA: Lippincott, Williams and Wilkins 2005.  
43
- 44  
45 26. Hamil C, Sinclair H. Bracketing – practical considerations in Husserlian phenomenological  
46  
47 research. *Nurs Res* 2010;17(2):16-24.  
48
- 49  
50 27. Morse JM. Critical analysis of strategies for determining rigor in qualitative inquiry. *Qual*  
51  
52 *Health Res* 2015;25(9):1212-22.  
53
- 54  
55 28. Mullings B. Insider or outside, both or neither: some dilemmas of interviewing in a cross-  
56  
57 cultural setting. *Geoforum* 1999;30(4):337-350.  
58  
59  
60

- 1  
2  
3  
4  
5  
6  
7  
8  
9  
10  
11  
12  
13  
14  
15  
16  
17  
18  
19  
20  
21  
22  
23  
24  
25  
26  
27  
28  
29  
30  
31  
32  
33  
34  
35  
36  
37  
38  
39  
40  
41  
42  
43  
44  
45  
46  
47  
48  
49  
50  
51  
52  
53  
54  
55  
56  
57  
58  
59  
60
29. Premji SS, Nyanza EC, Riziki P. Psychosocial health of women in Mwanza City: pregnancy-related anxiety, depression, and preterm birth. University Research Grants Committee, Seed Grant Application. Calgary, AB: Author 2013.
30. Fairlie TG, Gillan MW, Rich-Edwards J. High pregnancy-related anxiety and prenatal depressive symptoms as predictors of intention to breastfeed and breastfeeding initiation. *J Womens Health* 2009;18(7):945-53.
31. Streubert HJ, Carpenter DR. Qualitative research in nursing: advancing the humanistic imperative (5<sup>th</sup> ed.). Philadelphia, PA: Lippincott, Williams and Wilkins 2011.
32. Knaack P. Phenomenological research. *West J Nurs Res* 1984;6(1):107-14.
33. Loiselle CG, Profetto-McGrath J, Polit DF, *et al.* Canadian essentials of nursing research (3<sup>rd</sup> ed.). Philadelphia, PA: Lippincott Williams & Wilkins 2011.
34. Mathison S. Why triangulate? *Educ Res* 1988;17(2):13-7.
35. Patton MQ. Qualitative evaluation and research methods (3<sup>rd</sup> ed.). Thousand Oaks, CA: Sage Publications 2002.
36. Rahman A, Fisher J, Bower P, *et al.* Interventions for common perinatal mental disorders in women in low- and middle- income countries: a systematic review and meta-analysis. *Bull World Health Organ* 2012;91(8):593-601.
37. Brunton RJ, Dryer R, Saliba A, *et al.* Pregnancy anxiety: a systematic review of current scales. *J Affect Disord* 2015;176:24-34.
38. Somerville S, Dedman K, Hagan R, *et al.* The perinatal anxiety screening scale: development and preliminary validation. *Arch Womens Ment Health* 2014;17(5):443-54.

- 1  
2  
3  
4  
5  
6  
7  
8  
9  
10  
11  
12  
13  
14  
15  
16  
17  
18  
19  
20  
21  
22  
23  
24  
25  
26  
27  
28  
29  
30  
31  
32  
33  
34  
35  
36  
37  
38  
39  
40  
41  
42  
43  
44  
45  
46  
47  
48  
49  
50  
51  
52  
53  
54  
55  
56  
57  
58  
59  
60
39. Rwakarema M, Premji SS, Nyanza EC, *et al.* Antenatal depression is associated with pregnancy-related anxiety, partner relations, and wealth in women in Northern Tanzania: a cross-sectional study. *BMC Womens Health* 2015;15:68.
40. Sawyer A, Ayers S, Smith H. Pre- and postnatal psychological wellbeing in Africa: a systematic review. *J Affect Disord* 2010;123(1):17-29.
41. Esimai OA, Fatoye FO, Quiah AG, *et al.* Antepartum anxiety and depressive symptoms: a study of Nigerian women during the three trimesters of pregnancy. *J Obstet Gynaecol* 2008;28(2):202-03.
42. Lazarus RS. Coping theory and research: Past, present, and future. *Psychosom Med* 1993;55:234-47.
43. Hamilton JG, Lobel M. Types, patterns, and predictors of coping with stress during pregnancy: examination of the Revised Prenatal Coping Inventory in a diverse sample. *J Psychosom Obstet Gynaecol* 2008;29(2):97-104.
44. Lazarus RS, Folkman S. Stress, appraisal, and coping. New York: Springer 1984.
45. Tuncay T. Spirituality in coping with HIV/AIDS. *HIV/AIDS Review* 2007;8(34):10-5
46. Glas G. Anxiety, Anxiety Disorders, Religion and Spirituality. *South Med J* 2007;100(6):621-25.
47. Mann JR, Mannan J, Quinones LA, *et al.* Religion, Spirituality, Social Support, and Perceived Stress in Pregnancy and Postpartum Hispanic Women. *J Obstet Gynecol Neonat Nurs* 2008;39(6):645-57.
48. Steglitz J, Ng R, Mosha J, *et al.* Divinity and Distress: the Impact of Religion and Spirituality on the Mental Health of HIV-Positive Adults in Tanzania. *AIDS Behav* 2012;16(8):2392-98.



- 1  
2  
3  
4  
5  
6  
7  
8  
9  
10  
11  
12  
13  
14  
15  
16  
17  
18  
19  
20  
21  
22  
23  
24  
25  
26  
27  
28  
29  
30  
31  
32  
33  
34  
35  
36  
37  
38  
39  
40  
41  
42  
43  
44  
45  
46  
47  
48  
49  
50  
51  
52  
53  
54  
55  
56  
57  
58  
59  
60
49. Cabieses B, Bird P. Glossary of access to health care and related concepts for low- and middle-income countries (LMICs): a critical review of international literature. *Int J Health Serv* 2014;44(4):845-61.
50. Exavery A, Kante AM, Hingora A, *et al*. How mistimed and unwanted pregnancies affect timing of antenatal care initiation in three districts in Tanzania. *BMC Pregnancy Childbirth* 2013;13(1):35.
51. Nyamtema AS, Jong AB, Urassa DP, *et al*. The quality of antenatal care in rural Tanzania: what is behind the number of visits? *BMC Pregnancy Childbirth* 2012;12(1):70-8.
52. Aaron E, Bonacquisti MS, Geller PA *et al*. Perinatal depression and anxiety in women with and without Human Immunodeficiency Virus Infection. *Womens Health Issues* 2015;25(5):579-85.

**APPENDIX**

## Interview Questions

1. Can you tell me about your experience so far in this pregnancy? Or Can you tell me about your experience while you were pregnant?
2. Tell me about a time during your pregnancy where you felt especially worried or concerned?
3. Tell me what worries you most about labour and delivery.
4. Tell me about a time when your worries were overwhelming or difficult to handle.
5. Tell me about how you would manage your worries at times when you felt especially worried.
6. What is the biggest concern you have about your pregnancy?
7. What is the biggest concern you have about the child?
8. What does it mean to you to have worries during your pregnancy?
9. Can you give me an example of a time where your worries affected your activities?
10. Can you give me an example of a time when your worries were relieved by a person or event?  
Or a time when your worries were not relieved?
11. Can you tell me what provided you with the most reassurance when you had concerns?
12. Can you tell me about any aspects of your relationship that have had an effect your worries?
13. Can you tell me about any aspects of your family or friends that have had an effect on your worries?

## COREQ (COnsolidated criteria for REporting Qualitative research) Checklist

A checklist of items that should be included in reports of qualitative research. You must report the page number in your manuscript where you consider each of the items listed in this checklist. If you have not included this information, either revise your manuscript accordingly before submitting or note N/A.

| Topic                                          | Item No. | Guide Questions/Description                                                                                                                              | Reported on Page No. |
|------------------------------------------------|----------|----------------------------------------------------------------------------------------------------------------------------------------------------------|----------------------|
| <b>Domain 1: Research team and reflexivity</b> |          |                                                                                                                                                          |                      |
| <i>Personal characteristics</i>                |          |                                                                                                                                                          |                      |
| Interviewer/facilitator                        | 1        | Which author/s conducted the interview or focus group?                                                                                                   |                      |
| Credentials                                    | 2        | What were the researcher's credentials? E.g. PhD, MD                                                                                                     |                      |
| Occupation                                     | 3        | What was their occupation at the time of the study?                                                                                                      |                      |
| Gender                                         | 4        | Was the researcher male or female?                                                                                                                       |                      |
| Experience and training                        | 5        | What experience or training did the researcher have?                                                                                                     |                      |
| <i>Relationship with participants</i>          |          |                                                                                                                                                          |                      |
| Relationship established                       | 6        | Was a relationship established prior to study commencement?                                                                                              |                      |
| Participant knowledge of the interviewer       | 7        | What did the participants know about the researcher? e.g. personal goals, reasons for doing the research                                                 |                      |
| Interviewer characteristics                    | 8        | What characteristics were reported about the interviewer/facilitator? e.g. Bias, assumptions, reasons and interests in the research topic                |                      |
| <b>Domain 2: Study design</b>                  |          |                                                                                                                                                          |                      |
| <i>Theoretical framework</i>                   |          |                                                                                                                                                          |                      |
| Methodological orientation and Theory          | 9        | What methodological orientation was stated to underpin the study? e.g. grounded theory, discourse analysis, ethnography, phenomenology, content analysis |                      |
| <i>Participant selection</i>                   |          |                                                                                                                                                          |                      |
| Sampling                                       | 10       | How were participants selected? e.g. purposive, convenience, consecutive, snowball                                                                       |                      |
| Method of approach                             | 11       | How were participants approached? e.g. face-to-face, telephone, mail, email                                                                              |                      |
| Sample size                                    | 12       | How many participants were in the study?                                                                                                                 |                      |
| Non-participation                              | 13       | How many people refused to participate or dropped out? Reasons?                                                                                          |                      |
| <i>Setting</i>                                 |          |                                                                                                                                                          |                      |
| Setting of data collection                     | 14       | Where was the data collected? e.g. home, clinic, workplace                                                                                               |                      |
| Presence of non-participants                   | 15       | Was anyone else present besides the participants and researchers?                                                                                        |                      |
| Description of sample                          | 16       | What are the important characteristics of the sample? e.g. demographic data, date                                                                        |                      |
| <i>Data collection</i>                         |          |                                                                                                                                                          |                      |
| Interview guide                                | 17       | Were questions, prompts, guides provided by the authors? Was it pilot tested?                                                                            |                      |
| Repeat interviews                              | 18       | Were repeat interviews carried out? If yes, how many?                                                                                                    |                      |
| Audio/visual recording                         | 19       | Did the research use audio or visual recording to collect the data?                                                                                      |                      |
| Field notes                                    | 20       | Were field notes made during and/or after the interview or focus group?                                                                                  |                      |
| Duration                                       | 21       | What was the duration of the interviews or focus group?                                                                                                  |                      |
| Data saturation                                | 22       | Was data saturation discussed?                                                                                                                           |                      |
| Transcripts returned                           | 23       | Were transcripts returned to participants for comment and/or                                                                                             |                      |

| Topic                                  | Item No. | Guide Questions/Description                                                                                                        | Reported on Page No. |
|----------------------------------------|----------|------------------------------------------------------------------------------------------------------------------------------------|----------------------|
|                                        |          | correction?                                                                                                                        |                      |
| <b>Domain 3: analysis and findings</b> |          |                                                                                                                                    |                      |
| <i>Data analysis</i>                   |          |                                                                                                                                    |                      |
| Number of data coders                  | 24       | How many data coders coded the data?                                                                                               |                      |
| Description of the coding tree         | 25       | Did authors provide a description of the coding tree?                                                                              |                      |
| Derivation of themes                   | 26       | Were themes identified in advance or derived from the data?                                                                        |                      |
| Software                               | 27       | What software, if applicable, was used to manage the data?                                                                         |                      |
| Participant checking                   | 28       | Did participants provide feedback on the findings?                                                                                 |                      |
| <i>Reporting</i>                       |          |                                                                                                                                    |                      |
| Quotations presented                   | 29       | Were participant quotations presented to illustrate the themes/findings?<br>Was each quotation identified? e.g. participant number |                      |
| Data and findings consistent           | 30       | Was there consistency between the data presented and the findings?                                                                 |                      |
| Clarity of major themes                | 31       | Were major themes clearly presented in the findings?                                                                               |                      |
| Clarity of minor themes                | 32       | Is there a description of diverse cases or discussion of minor themes?                                                             |                      |

Developed from: Tong A, Sainsbury P, Craig J. Consolidated criteria for reporting qualitative research (COREQ): a 32-item checklist for interviews and focus groups. *International Journal for Quality in Health Care*. 2007. Volume 19, Number 6: pp. 349 – 357

**Once you have completed this checklist, please save a copy and upload it as part of your submission. DO NOT include this checklist as part of the main manuscript document. It must be uploaded as a separate file.**
