# Supplementary material for: A qualitative study of pregnancy-related anxiety among women in Tanzania
Source: PubMed Central journal article supplement — BMJ Open. 2017 Aug 3;7(8):e016072. doi: 10.1136/bmjopen-2017-016072 (PMC5629724; doi:10.1136/bmjopen-2017-016072), 2017-08-03
Supplement: bmjopen-2017-016072supp001.pdf [file bmjopen-2017-016072supp001.pdf]

## **APPENDIX**

### Interview Questions

1. Can you tell me about your experience so far in this pregnancy? Or Can you tell me about your experience while you were pregnant?
2. Tell me about a time during your pregnancy where you felt especially worried or concerned?
3. Tell me what worries you most about labour and delivery.
4. Tell me about a time when your worries were overwhelming or difficult to handle.
5. Tell me about how you would manage your worries at times when you felt especially worried.
6. What is the biggest concern you have about your pregnancy?
7. What is the biggest concern you have about the child?
8. What does it mean to you to have worries during your pregnancy?
9. Can you give me an example of a time where your worries affected your activities?
10. Can you give me an example of a time when you worries were relieved by a person or event?  
Or a time when your worries were not relieved?
11. Can you tell me what provided you with the most reassurance when you had concerns?
12. Can you tell me about any aspects of your relationship that have had an effect your worries?
13. Can you tell me about any aspects of your family or friends that have had an effect on your worries?
